# Supplementary material for: Contributions of associative and non-associative learning to the dynamics of defensive ethograms
Source: eLife. 2024 Dec 16;12:RP90414. doi: 10.7554/eLife.90414 (PMC11649235; doi:10.7554/eLife.90414)
Supplement: Figure 2—source data 1. [file elife-90414-fig2-data1.xlsx]

## Sheet: 2A
F=female, M=male
Tone %Freezing	Paired(PA)
Trial	F1	F2	F3	F4	F5	F6	F7	F8	F9	F10	F11	F12	F13	F14	F15	F16	M1	M2	M3	M4	M5	M6	M7	M8	M9	M10	M11	M12	M13	M14	M15	M16
1	0	32	55.6662	30.333	35.9997	10.3332	26.9997	72.3148	96.981	18.3332	58.3327	50.9997	0	56.6662	25.333	73.6658	16.3332	0	28.333	54.3325	45.6662	20.6487	96.6478	81.666	0	0	96.981	83.999	51.9995	90.3143	49.9995	11
2	79.3325	12.9998	35.9997	13.6665	39.9675	48.666	97.6338	48.333	54.9672	50.9672	59.9995	23.333	96.967	46.301	71.666	11.6665	0	37.666	52.6658	96.6658	84.6338	7.30125	84.3005	0	60.9672	0	96.967	13.6665	75.666	42.6343	53.6662	94.999
3	97.2883	0	72.2885	75.9993	78.9553	84.6218	68.2885	95.6658	92.6218	62.9552	94.999	76.3325	97.2883	53.9555	93.6215	95.2885	72.3328	48.9995	53.666	66.2887	84.3325	17.9997	97.2883	32.333	68.9993	86.9553	96.3323	24.9557	91.6658	65.999	86.6655	93.2885
4	86.999	75.9393	95.2725	30.9997	58.6662	70.9995	97.2722	96.939	97.6058	55.273	91.2725	47.9995	68.2725	94.6058	97.2722	97.6058	56.6063	45.333	83.3325	83.3325	73.3325	81.9993	30	62.9993	28.333	44.3327	68.9993	32.9997	95.2725	97.2722	85.3325	97.939
5	41.7413	86.5918	95.2585	74.3325	89.2585	64.6663	11.3332	62.5917	92.925	41.666	97.5918	49.666	97.925	92.3325	45.9995	86.2585	32.9995	0	68.3323	51.666	98.2583	0.926	75.6655	45.6662	0	79.666	97.5918	97.5918	97.2583	84.999	80.5918	82.999
Tone %Freezing	Unpaired (UN)
Trial	F1	F2	F3	F4	F5	F6	F7	F8	F9	F10	M1	M2	M3	M4	M5	M6	M7	M8	M9	M10
1	0	0	22.6485	0	10.982	0	29.6665	0	72.9813	0	32.6485	63.666	0	68.3328	49.3327	16.3332	37.6662	55.3327	20.9818	0
2	0	0	0	37.6665	0	0	40.3325	61.6662	0	35.3332	52.0255	35.9745	0	0	57.666	50.666	58.9742	24.6665	56.9995	0
3	31.3332	0	28.9997	0	53.9995	20.9587	41.9997	60.9588	31.9995	36.6662	63.625	53.3745	19	74.625	53.9585	75.3325	36.6255	25.3332	80.666	25.6665
4	0	19.6665	38.9997	60.3327	10.6668	0	52.3327	76.9993	21.9997	10.6665	43.3327	11.6675	43.333	59.3327	77.3325	83.9393	82.999	54.3327	65.9995	49.333
5	11.9998	0	0	24.6665	41.5955	0	54.666	36.333	48.3327	58.262	18.3332	28.9997	51.262	53.9995	6.2625	61.666	96.9283	46.3327	0	59.666
Tone %Freezing	Paired Reverse (PA-R)
Trial	F1	F2	F3	F4	F5	M1	M2	M3	M4	M5
1	88.98	46.6662	41.333	48.9805	75.98	92.6467	47.647	50.3137	31.9808	31.333
2	90.2995	89.966	69.3328	29.9995	44.9665	11	30.6665	61.9663	15.6665	10.9998
3	51.3327	67.6658	91.6208	15.6665	82.9543	26.288	53.288	38.333	85.6658	42.3332
4	59.9385	91.938	27.6665	85.6047	73.6047	68.9993	12.6665	93.2715	71.2717	28.9995
5	53.2578	39.5913	86.5907	8.5915	32.9248	45.2578	37.6662	62.2578	64.2578	21.6663
Tone %Freezing	Unpaired Reverse (UN-R)
Trial	F1	F2	F3	F4	F5	M1	M2	M3	M4	M5
1	20.3332	13.333	20.6665	0	0	91.6857	31.6663	100	0	0
2	41.307	14.3332	22.307	18.0267	0	0	41.3068	95	0	99.6928
3	0	39.376	74.9573	83.0002	22.376	95.042	63.3338	67.042	39.333	6.7095
4	26.7282	70.3945	59.667	10.9998	18.0615	90.3335	80.9382	86.7275	81	52.3948
5	12.5947	26.0723	31.6663	58.594	0	100	64.7385	100	62.072	51.6662

## Sheet: 2B
F=female, M=male	WN=white noise
WN %Freezing	Paired(PA)
Trial	F1	F2	F3	F4	F5	F6	F7	F8	F9	F10	F11	F12	F13	F14	F15	F16	M1	M2	M3	M4	M5	M6	M7	M8	M9	M10	M11	M12	M13	M14	M15	M16
1	0	0	0	5.35325	0	0	0	0	0	0	0	0	0	0	0	0	0	0	0	0	0	0	0	0	0	0	0	0	14	0	17	0
2	0	0	27.9995	0	0	0	0	0	0	0	0	0	0	0	0	0	0	0	12.6665	0	0	0	0	0	0	0	0	0	0	0	0	0
3	0	0	0	3.37925	0	0	0	0	12.333	13.6665	0	0	0	0	0	0	0	0	0	15.6665	10.3332	0	0	0	0	0	0	0	0	0	13.6668	0
4	0	0	0	5.7285	0	0	0	0	0	15.333	0	0	0	0	0	0	0	0	0	0	0	0	0	0	0	0	28.9997	0	0	0	23.6665	0
5	2.25825	0	26.333	0	0	0	0	0	0	0	0	0	15.9998	0	0	0	0	0	21.6665	0	16.9997	0	0	0	0	49.3327	0	0	16.9997	0	0	0
WN %Freezing	Unpaired (UN)
Trial	F1	F2	F3	F4	F5	F6	F7	F8	F9	F10	M1	M2	M3	M4	M5	M6	M7	M8	M9	M10
1	0	2.35325	0	4.35325	0	0	0	4.02	0	0	0	0	0	0	0	2.68675	5.35325	0	0	0
2	1.36025	0	0	0	1.69375	7.6935	8.36025	9.027	0	0	1.974	0	0	0	0	0	10.3603	8.36025	2.69375	0
3	4.04275	3.37625	0	0	0	0	0	3.7095	0	0	24.3332	0.2915	0	2.7095	0	4.37625	0	0	0	0
4	0	6.7285	0	3.39525	9.7285	8.39525	0	2.062	0.7285	0	0	2.939	0	6.06175	8.7285	0	0.06175	0	5.7285	0
5	0	0	0	2.406	0	0	0	0	0	4.07275	0	0	0	16.7395	0	0	37.4057	0	0.7395	0
WN %Freezing	Paired Reverse (PA-R)
Trial	F1	F2	F3	F4	F5	M1	M2	M3	M4	M5
1	5.35225	0	0	2.35225	16.3523	18.6855	3.35225	26.3523	5.019	0
2	6.36625	7.033	0	0	1.69975	0	0	2.69975	0	0
3	0	0	19.0448	0	4.37825	5.37825	1.71175	0	2.71175	0
4	4.39425	3.72775	0	3.39425	6.7275	23.6665	0	30.394	3.061	0
5	4.40825	6.40825	2.40825	2.74175	5.40825	35.0745	0	0.40825	5.40825	0
WN %Freezing	Unpaired Reverse (UN-R)
Trial	F1	F2	F3	F4	F5	M1	M2	M3	M4	M5
1	0	0	0	0	0	0	0	3.68575	0	0
2	0.69275	0	11.3592	0	0	0	6.6925	8.35925	0	0
3	0	0	6.37525	4.37525	0	0	0	0	0	0
4	15.333	0	8.06075	0	0	9.7275	9.39425	0	7.7275	0
5	9.73825	0	0	2.405	0	3.07175	0	30.0715	0	0

## Sheet: 2C
F=female, M=male
Tone activity index	Paired(PA)
Trial	F1	F2	F3	F4	F5	F6	F7	F8	F9	F10	F11	F12	F13	F14	F15	F16	M1	M2	M3	M4	M5	M6	M7	M8	M9	M10	M11	M12	M13	M14	M15	M16
1	1.01967	0.469983	5.31107	0.604687	2.03172	1.4558	2.39278	0.128916	0.395249	0.776685	0.597015	1.15985	30.4326	1.18218	1.10304	0.451758	0.823823	1.18243	1.52872	0.592617	3.31587	2.98868	0.052881	0.049198	1.01774	1.16594	0.073289	0.063716	2.40454	0.236588	0.578794	1.00584
2	0.099185	0.782058	2.27749	0.60098	0.645101	1.90698	0.011932	0.15555	8.87169	1.31485	0.601697	7.9666	0.198881	1.30972	0.112018	1.7771	1.15686	0.343433	1.42985	0.111779	0.415207	4.69276	0.235054	1.23525	0.253834	1.35003	0	4.17605	1.34899	3.51855	1.5377	0.090579
3	0	0.218731	0.38279	0.051203	0.038386	0.342625	0.449755	0.041848	0.311526	0.119465	0.043508	0.564789	0.481044	1.82229	0.006543	0.115177	0.144735	0.160369	0.227696	0.682754	0.582691	4.58395	0.059112	0.486076	0.175174	0.044854	0.506973	1.43644	0.168322	1.66767	0.162144	0.068303
4	0.068987	0.8339	0.019436	0.382218	0.51918	0.412112	0.011434	0.011613	0.378699	0.136929	0.147693	0.320433	0.835301	0.568369	0	0.006162	0.069972	0.257356	0.064084	0.148023	0.665732	0.814213	1.32571	0.224909	0.857565	1.70123	0.87484	0.701834	0.260757	0.059147	0.341119	0.006986
5	3.4123	0.254994	0.03285	0.029264	0.062182	0.528259	4.97928	0.008824	0.680491	0.1548	0	0.481391	0.082039	0.174842	2.64886	0.095663	0.153119	0.476371	0.357714	0.329033	0.036966	6.48072	0.259978	0.183079	0.533246	0.038861	0.010495	0.005753	0.114636	0.663324	0.137925	0.064267
Tone activity index	Unpaired (UN)
Trial	F1	F2	F3	F4	F5	F6	F7	F8	F9	F10	M1	M2	M3	M4	M5	M6	M7	M8	M9	M10
1	1.69664	1.27298	0.520903	3.35136	1.42603	2.86003	1.37346	0.945401	0.133078	4.34102	2.18953	1.72786	1.13837	0.251477	0.837984	5.70432	3.78537	1.09268	3.68797	2.68813
2	1.5304	0.59507	2.54702	0.476583	1.80771	2.05573	1.01315	0.200037	0.977089	0.726747	0.469031	0.409171	1.81018	7.99521	0.37769	3.51212	2.82025	0.904947	1.15553	5.59959
3	0.955377	1.66448	0.580905	0.602698	0.202837	0.306695	2.66698	0.482151	1.55125	0.361701	0.550346	0.500123	10.3727	0.305256	0.711201	0.704322	7.30168	1.7515	0.538728	1.52323
4	1.45952	1.13528	0.276732	0.66492	0.29898	0.322295	0.586182	0.038527	0.70171	0.846088	0.504671	1.24995	0.650477	0.495722	0.420941	1.39227	1.51765	1.21545	1.55203	0.805256
5	0.558764	0.796206	2.72474	1.18432	0.272513	2.44039	1.54686	0.166797	0.126142	0.411605	0.955882	0.836137	0.612626	1.27348	1.44796	2.57564	0.021607	1.64549	9.95048	0.480977
Tone activity index	Paired Reverse (PA-R)
Trial	F1	F2	F3	F4	F5	M1	M2	M3	M4	M5
1	0.057958	1.70767	1.51984	1.18435	0.238942	0.003896	0.207867	14.111	0.890087	0.276333
2	0.006855	0.022757	0.184193	1.88125	0.22866	0.378091	0.420872	1.16546	0.947103	0.499164
3	1.51682	0.147226	0.019473	3.72291	0.066708	0.64309	0.149549	0.684444	0.167175	0.31826
4	0.173554	0.030319	0.941418	0.023384	0.079256	0.238624	2.82492	0.081775	0.20936	2.93833
5	1.42005	0.25657	0.085544	0.72952	0.171951	3.23288	1.77079	0.776972	0.113372	2.81516
Tone activity index	Unpaired Reverse (UN-R)
Trial	F1	F2	F3	F4	F5	M1	M2	M3	M4	M5
1	0.11266	2.12527	1.40984	1.28894	1.58469	1.594	0.537242	0.18406	8.07243	8.4853
2	0.151715	1.90726	2.67956	0.581071	3.58988	28.8351	0.328048	0.428415	10.7892	0.282717
3	0.767682	0.884188	0.474707	0.033654	0.35802	1.33125	0.435956	1.68946	0.677517	4.94918
4	0.211669	0.932876	2.52552	0.666209	2.53224	0.604806	0.23433	2.23847	0.365073	1.42619
5	1.3639	0.616348	1.92775	0.18572	5.49636	0.220418	0.539336	0.130905	0.485151	1.09926

## Sheet: 2D
F=female, M=male	WN=white noise
WN activity index	Paired(PA)
Trial	F1	F2	F3	F4	F5	F6	F7	F8	F9	F10	F11	F12	F13	F14	F15	F16	M1	M2	M3	M4	M5	M6	M7	M8	M9	M10	M11	M12	M13	M14	M15	M16
1	4.77274	4.12791	2.73652	0.569822	3.57767	3.17914	9.35287	6.44854	126.695	0.831198	8.15181	2.88499	43.5197	38.5883	23.2923	4.23688	1.99351	0.289571	2.49546	12.9295	30.5852	12.1907	13.4416	1.4314	5.4794	2.36558	2.84654	4.26482	27.0198	12.7103	1.80487	14.0764
2	6.78886	16.1823	4.22801	1.25625	2.39058	4.08443	14.3155	4.32817	33.5093	0.551624	9.58192	9.73829	67.3521	25.7937	10.8762	19.6322	3.40849	1.66784	2.80035	6.76313	23.4527	4.02153	15.2549	0.965521	8.88418	3.78036	18.3029	5.07186	79.1063	27.9418	17.2927	11.079
3	5.47506	12.2544	7.79047	3.66898	4.87258	2.41811	4.38172	5.1561	132.555	1.32831	1.50157	1.59339	118.239	16.4748	0.88542	17.9869	2.40698	2.45072	3.7787	0.807709	24.3853	17.3286	9.12487	3.29007	4.96846	1.26615	7.43092	9.24915	36.2936	19.7362	0.805429	5.72139
4	4.67572	13.6433	12.0545	4.18191	3.71551	3.03987	10.6444	5.27551	8.20934	0.777113	7.23682	3.49107	61.9875	20.6563	3.18056	10.8486	4.03344	1.42084	2.25405	0.632764	19.6556	9.75718	6.88173	0.960162	5.27291	2.97065	1.4669	5.14471	30.0464	15.5098	0.833947	8.17547
5	4.94448	8.52817	7.37716	2.8256	6.20091	6.61067	16.4044	7.43997	33.3752	0.37627	7.71257	7.06118	4.71885	24.9033	21.4496	18.392	3.988	2.54785	1.61971	5.75404	16.9078	25.0862	11.3094	3.05793	5.97905	0.152635	19.8348	0.748773	20.8625	9.74442	26.9992	10.4362
WN activity index	Unpaired (UN)
Trial	F1	F2	F3	F4	F5	F6	F7	F8	F9	F10	M1	M2	M3	M4	M5	M6	M7	M8	M9	M10
1	2.56449	2.40632	3.30081	5.67503	0.928884	1.76746	17.5564	0.725744	2.73133	2.19366	9.45957	4.75158	8.58218	0.897385	7.79245	5.74742	11.455	5.33105	9.58486	5.5908
2	2.81792	0.917293	3.39603	4.96919	1.90366	0.746982	2.93607	0.388645	2.85348	1.21073	0.868967	2.56113	6.4829	14.6732	1.55471	16.3227	10.7467	1.54379	13.4395	6.24416
3	0.776954	0.286576	0.92856	0.825978	0.245717	0.647875	18.0023	1.58713	6.1544	1.73751	1.05363	3.24676	10.9181	2.16423	6.39972	11.458	61.2009	2.51614	16.7654	5.42752
4	3.51329	1.02506	1.15108	2.47353	0.363156	0.434611	1.29523	2.12423	3.58121	1.25925	2.78847	1.58002	1.82974	5.52305	5.68072	5.03602	41.3807	5.55663	17.7538	6.16312
5	1.43869	1.47119	4.74555	3.67429	1.06686	1.73549	8.00105	0.649504	5.53227	0.669161	1.40776	3.59834	3.46904	0.85986	7.09012	3.49774	4.58083	2.10529	12.1062	3.16674
WN activity index	Paired Reverse (PA-R)
Trial	F1	F2	F3	F4	F5	M1	M2	M3	M4	M5
1	0.679434	4.5228	4.38651	0.389295	0.568198	0.618101	2.62389	1.94768	7.58215	2.30604
2	0.164397	0.324484	1.37922	4.02431	0.691713	2.36212	2.93203	2.63749	0.610294	0.959408
3	1.61672	1.27559	0.594292	1.76226	0.369544	1.43153	2.09028	7.13051	0.905462	4.76846
4	0.279854	2.09698	3.5052	0.167125	0.393963	0.516832	2.43077	1.13762	5.65601	0.454954
5	1.28996	0.451957	1.41092	2.16416	0.326899	0.329433	0.97681	1.74038	0.509009	3.42418
WN activity index	Unpaired Reverse (UN-R)
Trial	F1	F2	F3	F4	F5	M1	M2	M3	M4	M5
1	1.56815	5.42157	20.8449	1.64324	6.09039	21.829	4.40431	15.8513	6.92431	14.7741
2	0.98197	4.32736	3.58903	1.65929	3.24481	43.4531	0.623163	40.1947	11.5101	1.88335
3	0.616973	5.18621	1.54822	0.276237	5.59749	28.3912	6.53634	29.6925	3.37251	16.1838
4	0.282443	3.86363	12.7246	0.512946	6.3441	8.40462	1.91346	22.1721	2.98632	11.9426
5	0.277823	4.5439	10.0807	0.428413	10.7638	12.6404	5.28995	3.31964	4.28208	10.9455

## Sheet: 2E
F=female, M=male
	Paired(PA)
	F1	F2	F3	F4	F5	F6	F7	F8	F9	F10	F11	F12	F13	F14	F15	F16	M1	M2	M3	M4	M5	M6	M7	M8	M9	M10	M11	M12	M13	M14	M15	M16
Average tone %freezing	61.0722	41.5061	70.8971	45.0662	60.5695	55.8573	60.3055	75.1689	87.0202	45.8389	80.4391	49.6662	72.0905	68.7722	66.7785	72.897	35.6544	26.3997	57.2659	70.4571	77.2446	25.775	76.7804	44.5329	31.6599	42.1908	91.3743	50.6425	82.3724	76.2438	71.2511	76.0451
	Unpaired (UN)
	F1	F2	F3	F4	F5	F6	F7	F8	F9	F10	M1	M2	M3	M4	M5	M6	M7	M8	M9	M10
Average tone %freezing	8.6666	3.9333	18.1296	24.5331	23.4488	4.19175	43.7995	47.1915	35.0626	28.1856	41.993	38.7364	22.719	51.258	48.9104	57.5874	62.6386	41.1996	44.9293	26.9331
	Paired Reverse (PA-R)
	F1	F2	F3	F4	F5	M1	M2	M3	M4	M5
Average tone %freezing	68.7617	67.1655	63.3088	37.7685	62.0861	48.8383	36.3869	61.2285	53.7685	27.0663
	Unpaired Reverse (UN-R)
	F1	F2	F3	F4	F5	M1	M2	M3	M4	M5
Average tone %freezing	20.1927	32.7018	41.8528	34.1242	8.0875	75.4123	56.3967	89.7539	36.481	42.0926

## Sheet: 2F
F=female, M=male
	Paired(PA)
	F1	F2	F3	F4	F5	F6	F7	F8	F9	F10	F11	F12	F13	F14	F15	F16	M1	M2	M3	M4	M5	M6	M7	M8	M9	M10	M11	M12	M13	M14	M15	M16
Average tone activity index	0.920028	0.511933	1.60473	0.33367	0.659314	0.929155	1.56904	0.06935	2.12753	0.500545	0.277983	2.09861	6.40597	1.01148	0.774094	0.489172	0.469702	0.483991	0.721613	0.372841	1.00329	3.91206	0.386548	0.435702	0.567512	0.860183	0.293119	1.27676	0.859449	1.22906	0.551537	0.247194
	Unpaired (UN)
	F1	F2	F3	F4	F5	F6	F7	F8	F9	F10	M1	M2	M3	M4	M5	M6	M7	M8	M9	M10
Average tone activity index	1.24014	1.0928	1.33006	1.25598	0.801615	1.59703	1.43733	0.366583	0.697854	1.33743	0.933893	0.944649	2.91687	2.06423	0.759154	2.77773	3.08931	1.32201	3.37695	2.21944
	Paired Reverse (PA-R)
	F1	F2	F3	F4	F5	M1	M2	M3	M4	M5
Average tone activity index	0.635047	0.432908	0.550093	1.50828	0.157103	0.899317	1.0748	3.36392	0.465419	1.36945
	Unpaired Reverse (UN-R)
	F1	F2	F3	F4	F5	M1	M2	M3	M4	M5
Average tone activity index	0.521524	1.29319	1.80347	0.551118	2.71224	6.51712	0.414982	0.934262	4.07787	3.24853

## Sheet: 2G
F=female, M=male	WN=white noise
	Paired(PA)
	F1	F2	F3	F4	F5	F6	F7	F8	F9	F10	F11	F12	F13	F14	F15	F16	M1	M2	M3	M4	M5	M6	M7	M8	M9	M10	M11	M12	M13	M14	M15	M16
Average WN %freezing	0.45165	0	10.8665	2.8922	0	0	0	0	2.4666	5.7999	0	0	3.19995	0	0	0	0	0	6.8666	3.1333	5.4666	0	0	0	0	9.86655	5.79995	0	6.19995	0	10.8666	0
	Unpaired (UN)
	F1	F2	F3	F4	F5	F6	F7	F8	F9	F10	M1	M2	M3	M4	M5	M6	M7	M8	M9	M10
Average WN %freezing	1.0806	2.4916	0	2.0309	2.28445	3.21775	1.67205	3.7637	0.1457	0.81455	5.26145	0.6461	0	5.10215	1.7457	1.4126	10.6362	1.67205	1.83235	0
	Paired Reverse (PA-R)
	F1	F2	F3	F4	F5	M1	M2	M3	M4	M5
Average WN %freezing	4.1042	3.4338	4.2906	1.69765	6.9132	16.5609	1.0128	11.9709	3.24	0
	Unpaired Reverse (UN-R)
	F1	F2	F3	F4	F5	M1	M2	M3	M4	M5
Average WN %freezing	5.1528	0	5.15905	1.35605	0	2.55985	3.21735	8.4233	1.5455	0

## Sheet: 2H
F=female, M=male	WN=white noise
	Paired(PA)
	F1	F2	F3	F4	F5	F6	F7	F8	F9	F10	F11	F12	F13	F14	F15	F16	M1	M2	M3	M4	M5	M6	M7	M8	M9	M10	M11	M12	M13	M14	M15	M16
Average WN activity index	5.33137	10.9472	6.83733	2.50051	4.15145	3.86645	11.0198	5.72966	66.8688	0.772903	6.83694	4.95378	59.1634	25.2833	11.9368	14.2193	3.16608	1.67536	2.58966	5.37744	22.9973	13.6768	11.2025	1.94102	6.1168	2.10707	9.97641	4.89586	38.6657	17.1285	9.54723	9.89769
	Unpaired (UN)
	F1	F2	F3	F4	F5	F6	F7	F8	F9	F10	M1	M2	M3	M4	M5	M6	M7	M8	M9	M10
Average WN activity index	2.22227	1.22129	2.7044	3.5236	0.901657	1.06648	9.55822	1.09505	4.17054	1.41406	3.11568	3.14757	6.2564	4.82354	5.70354	8.41237	25.8728	3.41058	13.9299	5.31847
	Paired Reverse (PA-R)
	F1	F2	F3	F4	F5	M1	M2	M3	M4	M5
Average WN activity index	0.806073	1.73436	2.25523	1.70143	0.470063	1.0516	2.21075	2.91874	3.05258	2.38261
	Unpaired Reverse (UN-R)
	F1	F2	F3	F4	F5	M1	M2	M3	M4	M5
Average WN activity index	0.745473	4.66854	9.75749	0.904025	6.40811	22.9437	3.75344	22.2461	5.81507	11.1459

## Sheet: 2I
F=female, M=male
	Paired(PA)
	F1	F2	F3	F4	F5	F6	F7	F8	F9	F10	F11	F12	F13	F14	F15	F16	M1	M2	M3	M4	M5	M6	M7	M8	M9	M10	M11	M12	M13	M14	M15	M16
Baseline %freezing	6.01847	2.75924	23.4627	16.222	2.33332	1	50.9069	14.2601	60.3523	6.05549	1.22221	13.7962	48.4625	23.5368	47.1282	26.185	2.94443	23.3887	16.0739	18.4998	25.5553	36.1292	35.7414	4.16661	20.3331	0.703694	19.223	28.2034	18.4443	64.7596	36.833	13.9443
	Unpaired (UN)
	F1	F2	F3	F4	F5	F6	F7	F8	F9	F10	M1	M2	M3	M4	M5	M6	M7	M8	M9	M10
Baseline %freezing	11.9999	17.8517	14.9824	7.55549	11.7046	0	55.6105	26.9812	46.7783	12.3888	41.8339	38.407	24.7405	38.2774	24.5368	45.2588	45.981	26.8145	35.0562	16.0925
	Paired Reverse (PA-R)
	F1	F2	F3	F4	F5	M1	M2	M3	M4	M5
Baseline %freezing	16.1295	7.38882	16.6294	10.2221	27.4627	26.6479	10.2036	47.1662	27.722	9.18508
	Unpaired Reverse (UN-R)
	F1	F2	F3	F4	F5	M1	M2	M3	M4	M5
Baseline %freezing	24.4627	50.7773	13.6295	33.9071	24.3331	43.8143	26.5368	67.4067	48.1292	22.1109
	Shock Only (SO)
	F1	F2	F3	F4	F5	F6	F7	F8	F9	F10	M1	M2	M3	M4	M5	M6	M7	M8	M9	M10
Baseline %freezing	14.8332	3.68514	18.759	15.111	23.7775	21.9257	10.648	10.0184	4.0555	14.2221	20.9628	18.9443	9.92585	51.3698	23.4812	14.8517	10.074	8.12956	12.611	17.4813

## Sheet: 2J
F=female, M=male
	Paired(PA)
	F1	F2	F3	F4	F5	F6	F7	F8	F9	F10	F11	F12	F13	F14	F15	F16	M1	M2	M3	M4	M5	M6	M7	M8	M9	M10	M11	M12	M13	M14	M15	M16
Average change in %freezing Tone-PreSCS	22.7508	34.9461	20.5733	38.8663	37.1397	36.6487	-14.2971	43.1713	15.2202	24.0237	40.4127	31.7997	2.0725	19.5688	20.3965	30.3465	25.4425	13.1999	39.1994	28.6487	-3.3978	-31.1533	31.3717	38.0663	22.7869	28.3968	40.5159	15.9041	27.8331	12.1071	8.06635	11.1995
	Unpaired (UN)
	F1	F2	F3	F4	F5	F6	F7	F8	F9	F10	M1	M2	M3	M4	M5	M6	M7	M8	M9	M10
Average change in %freezing Tone-PreSCS	-30.3778	-15.4666	-4.6071	-17.6419	-1.74415	-25.0162	-13.3778	16.263	10.396	8.45705	1.8095	3.9338	-34.2162	-15.179	-16.964	33.569	-17.0175	10.8081	-6.37655	-34.1659
	Paired Reverse (PA-R)
	F1	F2	F3	F4	F5	M1	M2	M3	M4	M5
Average change in %freezing Tone-PreSCS	49.4552	25.1925	27.5938	11.0619	24.0316	19.3087	23.0599	13.9256	31.7167	12.8726
	Unpaired Reverse (UN-R)
	F1	F2	F3	F4	F5	M1	M2	M3	M4	M5
Average change in %freezing Tone-PreSCS	3.34015	-3.35305	-3.13875	16.5431	-54.4921	10.8235	22.3443	10.5826	-16.5738	-13.6262

[truncated: 2 more sheets: 2K, 2L]
