# Supplementary material for: Contributions of associative and non-associative learning to the dynamics of defensive ethograms
Source: eLife. 2024 Dec 16;12:RP90414. doi: 10.7554/eLife.90414 (PMC11649235; doi:10.7554/eLife.90414)
Supplement: Figure 3—source data 1. [file elife-90414-fig3-data1.xlsx]

## Sheet: 3A
Paired %Cohort Jumps			WN=white noise
WN Pips	Trial 1	Trial 2	Trial 3	Trial 4	Trial 5
1	0	6.25	9.375	6.25	15.625
2	6.25	21.875	6.25	15.625	18.75
3	0	12.5	6.25	6.25	6.25
4	3.125	3.125	12.5	6.25	15.625
5	9.375	15.625	9.375	6.25	9.375
6	0	6.25	9.375	9.375	12.5
7	15.625	3.125	9.375	0	9.375
8	9.375	9.375	0	3.125	9.375
9	3.125	0	0	6.25	6.25
10	6.25	6.25	3.125	12.5	9.375

## Sheet: 3B
Paired total WN jump frequencies (20 randomly selected)		WN=white noise
Timepoint from Tone onset (s)	Total
0-0.5
0.5-1.0
1.0-1.5
1.5-2.0	1
2.0-2.5
2.5-3.0
3.0-3.5
3.5-4.0
4.0-4.5
4.5-5.0
5.0-5.5
5.5-6.0
6.0-6.5
6.5-7.0
7.0-7.5
7.5-8.0
8.0-8.5
8.5-9.0
9.0-9.5	1
9.5-10.0
10.0-10.5	8
10.5-11.0	1
11.0-11.5	12
11.5-12.0	2
12.0-12.5	4
12.5-13.0	2
13.0-13.5	9
13.5-14.0	2
14.0-14.5	6
14.5-15.0	3
15.0-15.5	5
15.5-16.0	3
16.0-16.5	5
16.5-17.0	4
17.0-17.5	5
17.5-18.0	1
18.0-18.5	2
18.5-19.0	1
19.0-19.5	4
Timepoint from Shock onset (s)
0-0.5	19
0.5-1.0	6
1.0-1.5	6
1.5-2.0	1
2.0-2.5	1
2.5-3.0	0

## Sheet: 3C
Unpaired %Cohort Jumps
WN Pips	Trial 1	Trial 2	Trial 3	Trial 4	Trial 5
1	5	0	0	5	5
2	0	0	5	0	5
3	0	0	10	0	0
4	0	0	0	0	0
5	0	0	0	0	0
6	0	0	0	0	0
7	0	0	0	5	0
8	0	0	0	0	0
9	0	0	0	0	0
10	0	0	0	0	0

## Sheet: 3D
Unpaired total WN jump frequencies		WN=white noise
Timepoint from Tone onset (s)	Total
0-0.5
0.5-1.0
1.0-1.5
1.5-2.0
2.0-2.5
2.5-3.0
3.0-3.5
3.5-4.0
4.0-4.5
4.5-5.0
5.0-5.5
5.5-6.0
6.0-6.5
6.5-7.0
7.0-7.5
7.5-8.0
8.0-8.5
8.5-9.0	1
9.0-9.5
9.5-10.0
10.0-10.5	2
10.5-11.0	1
11.0-11.5	1
11.5-12.0	1
12.0-12.5	1
12.5-13.0
13.0-13.5
13.5-14.0
14.0-14.5
14.5-15.0
15.0-15.5
15.5-16.0
16.0-16.5	2
16.5-17.0
17.0-17.5
17.5-18.0
18.0-18.5
18.5-19.0
19.0-19.5
Timepoint from Shock onset (s)
0-0.5	18
0.5-1.0	12
1.0-1.5	4
1.5-2.0
2.0-2.5
2.5-3.0

## Sheet: 3E
Cumulative Jump timings relative to WN onset
Trials	Paired (20 randomly selected)
1	6.05795	9.47795	3.34445	4.54443	6.27775	7.6444	7.24545	6.07407	6.47405	1.3813	7.28125
2	1.32963	5.22957	1.04775	4.0144	9.481	5.20122	0.4342	1.10085	9.36745	1.79127	2.20205	3.2687	4.6687	0.230625	2.29725	7.36388	1.3045	2.33783	4.3378	6.70445
3	1.48608	3.1194	6.58603	6.49395	0.571	3.13762	9.4944	4.22398	9.48108	3.22527	3.9586	0.42045	1.35375	4.18708	3.96095	5.29427
4	1.27575	3.12832	1.31715	2.61713	4.98377	9.49408	5.77438	1.31515	2.3818	9.08173	1.81028	8.67688	9.34352	0.350875	1.7842	3.0175	4.35083	5.08823
5	-8.03438	1.2322	5.09882	3.34037	7.407	0.2316	-0.54385	0.9507	6.99755	0.303725	3.4037	7.47032	8.3703	9.3703	3.1942	0.005	1.07167	4.10497	5.90008	6.80007	3.26697	5.80732	8.34065	9.34062	9.45833

## Sheet: 3F
Cumulative Jump timings relative to WN onset
Trials	Unpaired
1	0.81245
2
3	-1.25888	2.05777	2.52445	1.75372
4	6.27425	0.3203
5	0.307625	1.27428

## Sheet: 3G
Paired Reverse %Cohort Jumps
WN Pips	Trial 1	Trial 2	Trial 3	Trial 4	Trial 5
1	0	0	0	0	0
2	0	0	0	0	0
3	0	0	0	0	0
4	0	0	0	0	0
5	0	0	0	0	0
6	0	0	0	0	0
7	0	0	0	0	0
8	0	0	0	0	0
9	0	10	0	0	0
10	0	0	10	0	0

## Sheet: 3H
Unpaired Reverse %Cohort Jumps
WN Pips	Trial 1	Trial 2	Trial 3	Trial 4	Trial 5
1	0	10	10	10	0
2	0	0	0	10	20
3	0	0	0	0	10
4	0	0	0	0	10
5	0	0	0	0	0
6	0	0	0	0	10
7	0	0	0	0	0
8	0	0	0	0	0
9	0	0	0	0	0
10	0	0	0	0	0

## Sheet: 3I
	PA	UN	PA-R	UN-R
%Cohort jump to WN	75	20	10	40

## Sheet: 3J
	PA	UN	PA-R	UN-R	SO
%Cohort jump to shock	50	70	80	90	60
