# Supplementary material for: Contributions of associative and non-associative learning to the dynamics of defensive ethograms
Source: eLife. 2024 Dec 16;12:RP90414. doi: 10.7554/eLife.90414 (PMC11649235; doi:10.7554/eLife.90414)
Supplement: Figure 4—source data 1. [file elife-90414-fig4-data1.xlsx]

## Sheet: 4A
Paired %Cohort Darts			WN=white noise
WN Pips	Trial 1	Trial 2	Trial 3	Trial 4	Trial 5
1	0	6.25	0	0	12.5
2	12.5	9.375	15.625	9.375	9.375
3	12.5	6.25	3.125	3.125	3.125
4	0	0	0	9.375	9.375
5	3.125	6.25	3.125	6.25	9.375
6	6.25	0	0	0	0
7	3.125	3.125	6.25	0	3.125
8	0	3.125	0	0	0
9	6.25	0	6.25	3.125	6.25
10	6.25	9.375	0	3.125	6.25

## Sheet: 4B
Paired total WN dart frequencies (20 randomly selected)		WN=white noise
Timepoint from Tone onset (s)	Total
0-0.5
0.5-1.0
1.0-1.5
1.5-2.0
2.0-2.5
2.5-3.0
3.0-3.5
3.5-4.0
4.0-4.5
4.5-5.0
5.0-5.5
5.5-6.0
6.0-6.5
6.5-7.0
7.0-7.5
7.5-8.0
8.0-8.5
8.5-9.0
9.0-9.5
9.5-10.0
10.0-10.5	3
10.5-11.0	1
11.0-11.5	9
11.5-12.0	1
12.0-12.5	7
12.5-13.0
13.0-13.5	4
13.5-14.0
14.0-14.5	7
14.5-15.0
15.0-15.5	1
15.5-16.0
16.0-16.5	3
16.5-17.0
17.0-17.5	1
17.5-18.0
18.0-18.5
18.5-19.0	7
19.0-19.5	5
Timepoint from Shock onset (s)
0-0.5	38
0.5-1.0	14
1.0-1.5	1
1.5-2.0
2.0-2.5
2.5-3.0

## Sheet: 4C
Unpaired %Cohort Darts			WN=white noise
WN Pips	Trial 1	Trial 2	Trial 3	Trial 4	Trial 5
1	0	0	0	0	0
2	0	0	0	0	0
3	0	0	0	0	0
4	0	0	0	0	0
5	0	0	0	0	0
6	0	0	0	0	0
7	0	0	0	0	0
8	0	0	0	0	0
9	0	0	0	0	0
10	0	3.125	0	0	0

## Sheet: 4D
Unpaired total WN dart frequencies		WN=white noise
Timepoint from Tone onset (s)	Total
0-0.5
0.5-1.0
1.0-1.5
1.5-2.0
2.0-2.5
2.5-3.0
3.0-3.5
3.5-4.0
4.0-4.5
4.5-5.0
5.0-5.5
5.5-6.0
6.0-6.5	1
6.5-7.0
7.0-7.5
7.5-8.0
8.0-8.5
8.5-9.0
9.0-9.5
9.5-10.0
10.0-10.5
10.5-11.0
11.0-11.5
11.5-12.0
12.0-12.5
12.5-13.0
13.0-13.5
13.5-14.0
14.0-14.5
14.5-15.0
15.0-15.5
15.5-16.0
16.0-16.5
16.5-17.0
17.0-17.5
17.5-18.0
18.0-18.5
18.5-19.0
19.0-19.5	1
Timepoint from Shock onset (s)
0-0.5	68
0.5-1.0	8
1.0-1.5	2
1.5-2.0
2.0-2.5
2.5-3.0

## Sheet: 4E
Cumulative Dart timings relative to WN onset
Trials	Paired (20 randomly selected)
1	2.17512	6.24178	1.44953	8.50827	8.83235	2.24638	5.20936	9.14269	4.07627	2.04989	1.05397
2	4.2996	1.38532	1.44083	0.099275	8.99928	-7.60976	0.467467	5.1008	9.06747	2.21191	9.04524	7.25869
3	6.10966	2.33186	9.12348	8.61453	1.89203	1.13624	4.34822
4	2.23444	1.14799	8.71466	3.07257	1.35326	3.1833	4.46105
5	0.225692	3.01458	2.20576	8.70576	1.06364	8.56364	9.13844	4.1684	3.14584	1.30783	4.24117	1.14823	4.08156	3.07343

## Sheet: 4F
Cumulative Dart timings relative to WN onset
Trials	Unpaired
1
2	9.10938
3	-4.5242
4
5

## Sheet: 4G
	PA	UN	PA-R	UN-R
%Cohort dart to WN	68.75	5	0	0

## Sheet: 4H
Pre-SCS Avg Distance Traveled (cm)				F=female, M=male
	PA
	F1	F2	F3	F4	F5	F6	F7	F8	F9	F10	F11	F12	F13	F14	F15	F16	M1	M2	M3	M4	M5	M6	M7	M8	M9	M10	M11	M12	M13	M14	M15	M16
	15.23	9.376	7.106	50.6	20.37	22.36	3.642	19.34	0.6741	25.3	6.429	6.233	0.9703	2.394	4.139	4.478	35.53	31.56	30.46	5.601	3.34	3.8	7.565	30.95	21.37	25.54	3.572	7.308	1.518	2.705	3.166	8.013
	UN
	F1	F2	F3	F4	F5	F6	F7	F8	F9	F10	M1	M2	M3	M4	M5	M6	M7	M8	M9	M10
	28.97	32.87	16.92	11.74	32.97	17.18	2.848	9.824	16.83	9.693	7.496	19.33	6.842	5.62	9.141	1.899	1.272	5.292	3.379	8.514
	PA-R
	F1	F2	F3	F4	F5	M1	M2	M3	M4	M5
	29.86	9.876	11.07	34.83	16.53	13.4	21.8	3.07	8.212	14.55
	UN-R
	F1	F2	F3	F4	F5	M1	M2	M3	M4	M5
	35.8	11.65	5.419	41.3	7.809	0.9318	10.01	1.618	4.295	3.749

## Sheet: 4I
Tone Avg Distance Traveled (cm)				F=female, M=male
	PA
	F1	F2	F3	F4	F5	F6	F7	F8	F9	F10	F11	F12	F13	F14	F15	F16	M1	M2	M3	M4	M5	M6	M7	M8	M9	M10	M11	M12	M13	M14	M15	M16
	10.93	4.019	11.42	16.13	12.27	20.1	6.24	1.229	1.441	11.68	1.781	13.68	6.608	2.298	3.158	2.129	16.03	15.75	16.5	2.132	3.369	15.53	2.922	14.15	12.14	21.75	0.9421	9.625	1.286	3.031	1.687	1.886
	UN
	F1	F2	F3	F4	F5	F6	F7	F8	F9	F10	M1	M2	M3	M4	M5	M6	M7	M8	M9	M10
	36.57	36.15	23.11	14.76	26.23	28.18	4.072	3.462	8.333	13.06	6.893	18.35	22.91	13.38	7.681	5.334	3.811	7.121	11.76	19.2
	PA-R
	F1	F2	F3	F4	F5	M1	M2	M3	M4	M5
	17.79	2.948	5.355	29.03	2.467	11.76	22.55	9.933	3.702	18.68
	UN-R
	F1	F2	F3	F4	F5	M1	M2	M3	M4	M5
	17.96	14.35	8.407	20.97	12.85	6.089	3.829	1.411	17.14	11.19

## Sheet: 4J
WN Avg Distance Traveled (cm)				F=female, M=male			WN=white noise
	PA
	F1	F2	F3	F4	F5	F6	F7	F8	F9	F10	F11	F12	F13	F14	F15	F16	M1	M2	M3	M4	M5	M6	M7	M8	M9	M10	M11	M12	M13	M14	M15	M16
	55.89	77.12	43.5	54.39	62.82	69.28	39.97	80.02	42.05	17.25	39.55	29.56	58	52.69	46.16	60.03	27.75	51.72	66.42	31.94	72.09	50.46	83.46	61.63	69.4	45.5	34.85	34.67	58.69	45.94	28.43	65.37
	UN
	F1	F2	F3	F4	F5	F6	F7	F8	F9	F10	M1	M2	M3	M4	M5	M6	M7	M8	M9	M10
	62.22	38.33	44.03	38.64	27.72	18.49	25.65	9.963	57.46	12.29	20.41	59.5	48.89	27.69	55.63	15.38	30.51	17.26	45.56	40.34
	PA-R
	F1	F2	F3	F4	F5	M1	M2	M3	M4	M5
	23.19	15.91	23.33	45.2	7.725	13.05	47.22	8.503	25.37	35.9
	UN-R
	F1	F2	F3	F4	F5	M1	M2	M3	M4	M5
	26.15	55.68	50.55	36.86	47.1	22.65	36.88	37.78	25.74	40.63

[truncated: 1 more sheets: 4K]
