# Supplementary material for: Contributions of associative and non-associative learning to the dynamics of defensive ethograms
Source: eLife. 2024 Dec 16;12:RP90414. doi: 10.7554/eLife.90414 (PMC11649235; doi:10.7554/eLife.90414)
Supplement: Figure 5—source data 1. [file elife-90414-fig5-data1.xlsx]

## Sheet: 5A
Tone %Freezing			F=female, M=male
		Paired
	Trials	F1	F2	F3	F4	F5	F6	F7	F8	F9	F10	F11	F12	F13	F14	F15	F16	M1	M2	M3	M4	M5	M6	M7	M8	M9	M10	M11	M12	M13	M14	M15	M16
Ext1	1	0	39.315	83.9813	49.333	50.9993	13.3332	49	39.33	65.98	46	56.99	34.67	94.66	66.66	83.33	78.32	70.3328	45.9997	73.6655	88.6478	65.98	66.648	67.66	78.981	52.9995	61.32	15.3332	72.01	96.98	26.67	60.66	65.3
	2	71.9993	19.9997	71.9993	66.3037	57.6662	0	11.67	51.67	67.63	53.01	99.01	60	96.97	82.67	100	95.33	30.333	69.3325	97.3033	91.9993	96.97	91.6658	84.66	71.9702	83.6658	83.66	91.6658	60.99	75.67	50.67	30.34	92.66
	3	60.625	59.6662	75.9993	72.9993	23.9997	80.666	43.66	84	96.96	71	95.67	42.33	92.66	93.99	38	90.29	29.333	80.9993	61.6658	53.6662	90.3	63.3327	94.66	11	57.666	55	96.6248	80.63	87.33	84.62	53.34	44.33
	4	60.9993	66.6153	70.9993	54.666	0	95.6658	67	51.99	76.33	43.67	92	0	76.99	97.33	0	75.67	29.6665	79.3325	67.666	74.3328	94.99	75.3325	84	48.9995	34.9995	84.67	0	73	95.28	74.61	82.34	88.33
	5	65.9993	86.6658	64.9993	76.3325	0	61.666	94.61	17.66	89.61	84.94	84.33	73	97.27	10.67	0	83.33	36.333	97.999	73.9993	67.3328	96.61	67.3328	41.33	21.9997	52.333	72.34	96.6068	0	18	83.27	35.33	94
	6	41.9997	94.4015	69.9993	90.9993	14.2652	14.3332	72	44.33	81.66	85.67	46	48.99	33.01	60	57.4	85.6	38.3332	67.6658	99.999	91.9993	47.01	78.666	25.66	36.6662	29.333	67.34	50.6662	88.26	94.93	78.6	89.94	58.34
	7	39.9995	68.9993	35.333	54.3327	37.6662	71.3328	43	42.67	76.67	63.01	75.34	56.66	16.33	70.68	34	57.01	34.333	31.9997	21.6665	39.666	30.33	23.6663	77	0	0	81.66	0	55.34	94.33	75.92	91.34	65.67
	8	22.3332	57.4288	103.428	54.666	0	0	100	76.33	64.76	0	98.1	75.33	83.77	93.43	0	89.76	33.6665	62.666	100	70.4287	56.43	31.333	65	16.6665	38.9995	86.76	21.4292	88.09	97.1	75.99	30.1	10.67
	9	63.6662	22.4405	44.9997	30.9997	22.5602	33.333	0	23.7	62	53	46.6	68.7	95.9	83.3	0	93.3	53.6662	71.666	85.3325	71.3325	34	0	79.3	9.99975	24.6665	63.6	0	94.2	84.7	48	95.9	50.6
	10	0	83.3323	79.5495	94.5493	0	96.3325	10	18.6	89.9	26.7	0	74.7	79.7	95	0	95.2	53.6662	73.3328	92.6658	90.6658	42.3	21.9997	43	12	24.9997	13	44.333	54.9	73.3	77.3	89	40.9
	11	14.333	55.333	76.3325	64.9998	0	33.6662	63.3	40	90	0	44.7	67.3	25.4	93.7	0	95.2	34.3327	29.6663	64.3328	66.666	44.6	0	53.7	0	25.6665	52.3	36.333	40.7	37.3	76.5	11.3	85.7
	12	74.138	0	75.666	12.6665	51.666	53.4712	65.3	67.1	84.6	14.3	20.1	39.3	26.7	95.8	0	86.8	58.3327	37.333	96.804	54.4712	42.5	33.4715	42.8	16.9997	16.6665	32.9	36.8047	100	74.8	39.4	98.1	34.1
	13	66.9993	21.9997	79.9993	19.9997	53.4825	43.666	94.9	0	89.7	40.3	80.4	51.8	59	79	0	46	11.6665	11	75.9993	41.9995	59.3	85.6658	24.8	35.9997	17.6665	0	54.3327	67.3	53.4	59	85.6	86.3
	14	10.9998	10.3332	46.829	41.1623	17.1715	91.999	16	48.4	69.4	22.7	0	38.3	0	0	0	64.8	49.9997	0	94.1617	35.1623	94.4	11.6665	13.5	0	41.1623	35.7	57.6662	86.8	82	52	79.5	25
	15	72.666	32.9997	61.3327	54.333	0	31.3328	22.6	15	12	0	94.7	23.4	16	68.7	19.8	94	35.333	66.9995	93.999	20.3332	38	45.6662	62.3	0	69.9993	0	51.3327	95.7	63.1	56.7	95.5	34.6
	16	20.9997	30.5177	0	73.6658	0	0	0	28	39.3	34	60.6	12	0	71.6	0	84	40.9995	13.9998	89.999	26.333	0	47.9995	26.7	0	0	31	70.3328	36.2	87	1.5	62	0
Ext2	1	52.6662	59.9995	60.01	61.33	75.6655	26.333	96.33	56.9995	87.33	20.333	32.6665	51.9815	35.333	89.6658	74.32	94.98	77.9995	74.99	79.99	76.3328	86.32	43.3327	93.3323	48.666	0	53.3327	60.6662	93	89.33	45.66	95.31	56.01
	2	49.3038	27.6665	55.31	86.34	58.666	35.9995	96.3	86.999	95.33	34.9997	83.6658	63.666	95.6658	64.3328	67.31	79.64	45.6662	35.33	84	88.6658	86.33	10.6665	70.9993	0	14.9998	41.6662	71.3325	95	93.34	0	86.37	83.3
	3	75.3325	47.6662	45	71.66	93.9993	81.999	98.62	67.9993	83.62	0	35.6665	47.3327	87.999	95.999	55.33	82.67	51.9995	66.33	87.29	57.333	53.67	22.9997	87.999	11.3332	15.3332	27.333	41.6662	84.33	93.67	96.62	83.28	10
	4	32.6662	96.6148	83.61	89.66	61.3325	55.6662	78.66	72.999	78.28	14.6665	53.3327	59.2818	76.666	82.6655	64	87	66.666	79.99	97.28	54.6665	85.66	23.3332	81.6658	0	33.6662	0	40.9997	42.67	74.33	87.67	96.28	0
	5	32.333	24.3332	12.67	70.28	35.9997	0	96.94	22.333	94	48.9405	62.6662	81.607	0	62.3327	48	94.94	47.9997	80	52.66	45.666	75.33	71.607	83.6658	45.274	19.333	0	20	69	92.67	63.67	73.66	72.67
	6	34.9995	13.3332	72.33	28.66	39.6662	0	62.01	12.9998	38.66	46.9995	15.333	0	30.9997	57.3327	59.32	80	48.6662	40.66	84	19	91	34.333	12.9998	0	26.9318	53.6662	36.9995	33.34	19.67	59	94.4	35.66
	7	11.6665	22.3332	25.66	49.66	46.9995	0	49	63.666	97.25	41.6662	78.6658	41.9995	11.9998	88.999	91.67	64	11.6668	23.67	82.68	53.5842	60.34	25.6663	44.3327	0	13.6668	19.3332	36.6665	82.33	38.67	96.58	82.66	84.67
	8	22.333	48.7625	95.43	0	0	48.7625	96.76	21.9997	71.23	67.7622	49.3327	16.6665	8.76275	47.9997	20.09	88.34	14.6665	37.1	58.09	7.09625	0	17.3332	51.4293	0	24.3332	0	53.7623	65.1	30.42	86	75.09	80.76
	9	14.9998	0	54	75.1	22.9997	47.333	96.9	49.9995	23.1	59.9993	68.3328	36.6662	78.9993	40.333	95.2	68.4	26.3332	28	51.3	21.6665	36	31.9997	16.333	0	37.3327	0	24.9995	0	70.4	53.4	35	82.6
	10	12.9998	0	12.6	66.7	33.333	46.6662	10.4	31.9997	62.7	75.3325	34.3327	47.333	64.3328	47.3327	27.3	94	55.2165	18	80	24.3332	83.2	16.3332	22.333	0	51.3327	0	56.3327	63.6	40	93	74.7	72.3
	11	0	10	61.3	13	66.8708	0	79.3	47.333	26.1	36.9995	13.3332	14.3332	0	84.8708	60.7	75.4	13.9998	0	20.4	25.3332	14.7	0	12.3332	0	16	0	21.3332	50	51.8	88.4	10.4	85.8
	12	23.6665	29.6663	57.8	42.3	21.4715	7.47175	19	31.6665	80.1	0	50.9995	0	80.4707	53.8043	80.7	87.9	1.805	49.3	20	0	85.1	11.3332	14.6665	0	0	32.6662	41.6665	18	79	38.1	81.5	35.1
	13	13.6665	12.6665	60.4	37.7	12.9998	23.9997	96.5	0	71.7	32.9997	70.3325	0	0	48.9995	82.6	59.7	24.6665	0	0	0	46	0	12.9998	0	26.9997	0	42.3327	53.2	46.8	80.8	92.7	81.7
	14	11.3332	0	0	88	25.1625	0	70.5	17.3332	62.2	73.1617	12	64.8285	57.3327	97.495	0	62.4	25.3328	36.6	84.7	10.3332	53.7	0	0	0	0	0	0	17.3	49.2	67.1	51.8	31.3
	15	0	21.3332	0	74.6	0	31.6663	11	35.8297	49.3	14.3332	0	44.333	0	80.3325	82	30.9	15.333	0	34.7	0	68	0	11.3332	0	0	0	14.9998	59.2	18	70	14.7	21.7
	16	0	13.9998	0	11.6	15.3332	0	0	34.9995	44.9	25.9997	45.3327	28.6665	0	0	62.7	69.4	11.9998	16.7	72.3	31.9997	28.7	16.3332	68.482	0	0	0	0	19.3	23	42.7	27.7	29.7
		Unpaired
	Trials	F1	F2	F3	F4	F5	F6	F7	F8	F9	F10	M1	M2	M3	M4	M5	M6	M7	M8	M9	M10
Ext1	1	0	10	0	0	23.67	0	50.666	54.3325	19.6665	55.9995	0	12	0	12.33	24.98	25.3332	66.3325	94.981	55.666	40.6662
	2	51.32	30.9995	13.3332	21.34	72.97	26.3332	10.6665	94.3033	81.3325	79.9993	0	49	14	0	43.64	22.971	51.3327	45.9995	89.6368	64.666
	3	16.96	30.333	10.3332	24.33	16.33	0	53.9588	38.6253	0	37.9995	0	0	0	0	25.63	0	13.2922	0	64.6252	79.3325
	4	21.33	15.9998	0	30.33	15.34	12.3332	55.666	78.615	38.282	0	0	0	45.96	80.71	34.72	0	88.615	0	30.6152	0
	5	77.6	33.333	0	0	61.67	42.9993	76.607	50.666	67.666	18.9997	0	0	0	47.67	0	68.2738	71.9405	0	29.6075	10.3332
	6	0	0	0	20.33	24.27	18.6665	52.9995	24.9997	0	8.5985	0	21.66	40	88	16	68.2648	76.3325	36.333	57.2647	10.9998
	7	15.66	0	0	0	0	0	0	16.5845	14.9998	32.9997	0	0	0	27.24	0	13	77.9993	21.9997	54.9175	0
	8	22.33	0	0	0	4.57	0	0	27.7628	24.9997	0	0	0	14	0	0	0	0	0	76	0
	9	80.7	0	0	0	16	0	10.3332	0	23.6665	0	12.3332	0	0	0	0	44.9995	80.9993	14.333	20	14.9998
	10	7.9	0	0	16.3	0	0	0	0	0	21.9997	0	0	0	0	0	43.8832	84.5493	36.333	0.55025	23.9997
	11	0	0	0	0	0	38.3327	0	43.6662	0	0	0	0	16.6	3.2	10.6	11.9998	54.9995	0	29.8712	7.20475
	12	10.3	0	0	0	0	32.3327	0	34.138	0	0	0	11	52.5	85.4	17.6	0	91.6658	12	0	36.333
	13	0	0	0	34.2	0	0	0	0	0	0	0	28	0	26	50.2	33.9995	73.666	0	0	0
	14	0	0	0	11.8	14	0	0	0	0	0	0	0	0	0	19.8	0	27.3332	33.6662	0	0
	15	14.3	0	0	12	31.6	0	0	0	0	0	39.5037	0	11.8	0	19.8	0	39.333	0	21.333	0
	16	0	0	11.333	0	0	3.81625	11.3332	51.9995	29.333	0	0	0	0	0	0	0	24.3332	0	0	0
Ext2	1	0	16	0	0	38.3147	0	10.3332	45.6662	0	0	0	0	0	0	0	14.333	76.9813	27.9997	28.6663	10.9998
	2	0.97	0	45.9708	64.33	0	23.333	39.666	52.9993	0	16.6665	31.333	20.6665	0	0	0	41.9705	0	0	36.6662	45.3327
	3	37.33	0	0	17.33	0	0	10	0	49.9997	75.666	0	0	0	0	0	18.6663	62.2918	18.6665	11.6665	30.333
	4	0	0	0	0	11.6665	0	37.6662	0	0	0	0	0	0	0	0	0	18.3332	9.949	0	15.6665
	5	28.33	0	0	48.67	0	0	0	0	0	0	0	0	19.9997	0	11.67	0	49.9408	17.6665	0	12
	6	0	0	0	15	0	33.6662	0	0	18.9318	0	0	0	0	0	29.99	0	15.3332	11.3332	0	30.333
	7	13.67	0	0	0	13.3332	0	0	0	40.251	0	0	0	0	0	0	0	0	0	16.3332	0
	8	0	0	0	16.67	0	0	0	44.2377	0	0	0	0	0	0	0	0	13.3332	26.6665	11	0
	9	13.7	0	0	0	0	0	0	0	0	0	0	0	0	0	0	0	0	11.3332	0	24.9997
	10	0	0	0	10.7	0	13	0	0	0	0	0	17.3332	0	0	0	11.9998	45.2165	0	22.6665	0
	11	1.5	0	0	12.7	0	0	46.9995	0	0	0	0	0	36.3327	20.2048	40.4	0	0	15.6665	0	0
	12	0	0	0	0	0	0	10.5292	0	18.9997	0	0	0	0	0	0	0	0	75.195	14.9998	0
	13	0	0	0	0	0	0	0	10.6665	17	0	0	0	22.6665	0	21	0	4.18475	0	0	0
	14	0	0	0	0	19.9997	0	30.334	0	0	15.6665	0	0	12.3332	0	0	0	39.8377	0	0	0
	15	0	0	0	0	0	0	0	0	10.6665	0	0	15.9998	0	12	18.5	17.6665	16.9997	0	0	0.83025
	16	0	0	0	0	0	11.3332	0	0	0	0	0	0	10	0	20	0	0	8.816	0	0
		Shock Only
	Trials	F1	F2	F3	F4	F5	F6	F7	F8	F9	F10	M1	M2	M3	M4	M5	M6	M7	M8	M9	M10
Ext1	1	33.9997	0	36.6482	56.3327	1.64875	36.9995	0	25.9818	0	0	31.315	0	9.31525	10.6485	0	28.3332	10.6668	11	17.6485	26.3332
	2	44.333	25.6665	57.3327	24.3332	15	52.333	0	0	0	0	11.3332	0	38.9995	52.9705	35.9995	17.3332	12	0	0	0
	3	0	25.9995	0	0	56.333	0	74.9993	0	17.9587	0	18.6665	1.959	41.6253	0	17.9997	0	24.9997	0	0	42.2923
	4	29.9997	0	20.6665	0	11.6665	20.3332	24.6665	33.333	0	0	26.6665	0.61575	0	0	12	0	0	0	0	0
	5	0	0	0	23.6663	22.6073	0	62.2735	0	12	0	0	0	0	20.9997	0	16.6665	12.9998	0	0	8.27425
	6	41.333	0	15	33.6662	0	11.3332	21.3332	0	0	0	35.5983	0	0	0	0	22.9997	0	0	10.3332	0
	7	17.9997	30.333	36.3327	0	20.333	18.3332	40.6665	0	0	0	0	0	1.25125	0	0	0	0	0	0	0
	8	0	22.9997	0	11.6665	0	0.23825	0	0	0	0	50.0958	16.3332	0	0	0	0	0	0	0	0
	9	0	15.6665	0	0	0	14.3332	0	0	0	0	0	0	0	20.333	0	0	10.3332	0	0	0
	10	0	30.333	31.6665	0	16.9997	0	0	0	0	0	0	10.3332	0	0	0	0	8.8835	0	0	0
	11	11.3332	0	34.333	0	0	0	18.6665	10.6668	0	0	0	0	0	0	0	0	0	0	0	0
	12	0	26.8047	0	0	19.6665	0	0	0	0	0	0	0	25.6665	46.4712	0	2.8625	0	32.4715	0	0
	13	11.6668	0	22.9997	0	0	0	13	7.18475	0	0	0	21.9997	0	0	0	0	0	0	0	0
	14	13.9998	0	0	0	0	0	11.5047	0	0	0	0	43.6662	0	0	0	0	0	0	0	0
	15	30.4965	0	20	0	34.6662	0	0	0	0	0	0	0	0	0	0	0	0	0	0	0
	16	0	0	0	17.9997	0	6.1495	12.4827	13.3332	12.9998	0	0	58.8158	62.149	71.8155	17.9997	0	41.4823	25.9997	0	10.6668
Ext2	1	24.333	11.9998	0	0	0	0	0	0	0	0	26.9997	0	0	0	0	0	0	0	0	0
	2	9.30425	25.3042	0	0	0	21.6665	41.3327	0	0	0	0	0	0	55.9703	0	12.3332	0	13.333	0	0
	3	11.333	12.9998	0	0	15.9998	0	0	0	0	0	0	28.9997	0	0	0	0	0	0	0	0
	4	0	0	0	0	0	0	0	0	0	16.6665	29.3332	22.3332	0	0	0	12.6668	0	0	12	0
	5	20.9997	0	0	0	11	0	11.6665	0	0	11.9998	0	10.6075	0	0	0	0	0	0	0	0
	6	13	0	10.9998	0	19.9997	0	14.333	11.3332	0	0	47.2647	0	0	22.333	0	0	0	0	0	0
	7	28.6665	0	48.6662	0	11	0	0	0	0	13	57.251	10	71.9995	0	0	0	0	0	0	0
	8	0	0	0	0	43.571	0	6.5715	0	0	0	0	0	21.4292	0	0	0	0	0	0	0
	9	0	0	11.3332	0	0	0	0	0	0	0	0	25.6663	0	0	0	0	0	0	0	0
	10	0	0	0	0	0	0	0	0	0	0	12.9998	1.8835	0	0	0	2.45075	0	0	0	0
	11	0	0	0	0	16.333	0	0	0	0	0	16.9997	10	0	12.3332	0	0	0	0	0	0
	12	0	0	0	0	13.9998	0	0	0	0	0	0	0	0	0	0	0	0	0	0	0
	13	0	10.6665	0	0	0	0	28.9997	11.6665	0	0	0	18.3332	0	0	0	0	0	0	0	0
	14	0	0	12.9998	0	0	0	0	0	13.9998	0	0	0	0	0	0	0	0	0	0	0
	15	0	14.83	0	0	0	0	8.83	0	0	0	0	0	0	0	0	0	0	0	0	0
	16	28.333	0	0	0	50.6662	12	0	0	49.8155	0	0	50.1493	0	33.333	72.1488	0	0	0	10.3332	0

## Sheet: 5B
Tone %Freezing
		Paired Reverse
	Trials	F1	F2	F3	F4	F5	M1	M2	M3	M4	M5
Ext1	1	92.0002	46.9805	42.0192	100	77.3335	24.9808	17.9808	85.0002	52.686	15.6865
	2	81.6967	61.3028	53.9695	77.9693	79.6667	2.36425	33.6972	84.9693	41.334	36.6362
	3	41.291	64.2905	76.3335	92	30.2913	29.7095	41.6662	78.3337	61.0425	24.0425
	4	20.0008	31.6672	100	100	58.0525	61.2805	40.9475	75.0005	56.6142	34.9997
	5	100	93.3335	89.3335	100	90.939	40.2732	79.3335	100	29.273	60.3338
	6	100	90	67.667	100	97.3335	77.2635	72.597	86.0002	36.6673	78.0005
	7	100.749	91.0002	100	100	90.667	61.3338	29.0008	48.9162	47.9165	16.6665
	8	100	97.0962	71.666	84.763	94.0962	77.43	22.9997	94	69.0965	52.3327
	9	100	30.9997	43.559	79.667	100	69.5588	45.334	96	80.999	32.6673
	10	93.3333	67.6667	82.667	76.7843	72.3337	66.451	57.5487	70.667	100	61.3338
	11	55.3338	86	59.2032	68.87	47.6673	100	71.3325	100	71.0002	64.3337
	12	100	35.6662	63.1385	85.472	68.472	79.3325	73.3328	100	92.6665	59.9995
	13	100	36.817	89.8162	100	90	79.3335	19.9997	100	53.15	35.817
	14	98.496	86.999	93.8295	93.1628	87.4963	58.3327	60.666	100	99.8293	52.163
	15	100	41.334	94.8377	57.162	80.6667	37.1715	70.667	100	69.3335	33.1623
	16	54.6668	32.519	77.8517	88.3335	100	85.0002	25.9995	100	40.5185	68.666
Ext2	1	100	47.0195	58.0003	86	36.3342	58.3135	100	100	54.9805	59.647
	2	100	100	73.636	75.6667	82.0005	35.333	70.3335	100	73.969	74.0002
	3	100	88.957	79.667	89.2905	59.334	92.6238	65.6243	100	92	87.3337
	4	94	48.614	63.3858	77.614	85	46.386	69.614	100	93.3855	0
	5	100	92.3335	70.9393	73.0602	91.0002	43.6063	62.333	100	77.6672	66.3335
	6	100	86.3335	90.3335	100	62.9305	82.7357	36.0695	100	71.3335	57.9993
	7	38.0835	47.0005	87.2495	85.75	100	50.0832	80.0002	100	80.9163	54.0005
	8	92.763	58.6662	93.0962	82.763	86.7632	22.9997	38.3327	100	57.7635	42.4303
	9	100	53.334	75.9995	50.0005	100	68.3337	52.6662	26.333	39.334	36.108
	10	98.5482	63.3338	78.667	51.118	100	66.6667	56.7845	100	69.3328	65.8822
	11	39.333	86.667	86.5365	66.5367	91.6667	30.2037	25.333	100	40.666	71.7965
	12	70.472	56.6662	86.1385	67.4723	83.1385	82	39.9997	100	62.139	34.333
	13	100	58.5165	64.8498	79.1497	73.1497	29.333	38.3327	100	54.1835	80.0002
	14	66.163	71.4965	25.333	49.9995	66.4965	71.163	33.9997	100	62.9993	85.4963
	15	84.5045	74.8375	31.6665	36.4955	100	65.4952	71.1617	100	41.838	64.3325
	16	100	34.8147	83.8143	72.0002	100	29.6663	52.9995	100	38.1853	19.333
		Unpaired Reverse
	Trials	F1	F2	F3	F4	F5	M1	M2	M3	M4	M5
Ext1	1	0	0	100	0	0	0	69.6667	46.0195	0	32.6662
	2	26.6675	0	22.9997	50.0305	0	0	0	86	32.333	58.0005
	3	0	40.7092	1.043	66.0002	0	0	0	30.0428	2.70975	0
	4	14	0	0	35.333	0	0	49.001	12.6665	2.053	34.9997
	5	4.7275	12	0	44.6065	12.3332	2.061	0	19.6665	35.333	65.3935
	6	0	0	0	11.403	0	0	20.333	0	4.07	0
	7	0	0	0	30.6663	0	50.9995	0	11.3332	0	21.333
	8	0	0	0	31.9997	0	0	44.43	0	0	0
	9	24.3332	11.3332	0	15.6668	0	0	0	0	0	10
	10	0	85.451	0	19.9997	0	0	23.6663	0	13.3332	0
	11	0	0	4.797	50.6665	0	57.13	0	54.667	0	0
	12	0	0	0	0	0	0	2.1395	75.666	0	0
	13	0	0	0	12.3332	0	15.3332	0	0	11.8503	18.1505
	14	0	25.6665	0	10.6665	0	18.3332	12.6665	0	0	0
	15	0	0	0	0	0	0	14.6668	30.6665	0	15.829
	16	12.6665	12.1858	34.1482	58.148	2.8525	7.519	0	52.3338	0	41.1855
Ext2	1	0	3.35325	0	10.6665	40.6865	0	0	0	0	0
	2	0	0	0	23	25.0308	9.36425	10.6975	31.6975	0	11.333
	3	0	0	20.291	0	13.3332	0	0	33.376	39.9577	0.043
	4	0	0	58.614	31.9477	0	57.9995	10.3332	0	0	0
	5	0	0	0	56.273	0	3.72775	0	0	0	0
	6	12.6665	0	52.9303	0	0	0	0	0	0	10.3332
	7	0	0	0	0	0	0	0	0	0	0
	8	0	0	0	0	10	0	4.4305	0	0	0
	9	39.4412	0	0	0	0	0	0	4.775	0	0
	10	0	11.6665	0	0	2.1185	0	0	0.1185	0	26.1182
	11	22.1303	0	14.6665	22.9997	0	0	15.3332	0	0	0
	12	0	0	30.4728	11.3332	0	10.806	0	0	0	53.666
	13	0	0	0	0	0	0	0	35.1502	16.6665	0
	14	0	0	0	0	0	0	0	83.3325	31.333	0
	15	0	0	0	12	0	13.6665	22.829	0	0	39.9995
	16	1.81525	0	0	0	0	25.6668	26.9997	14.815	24.1483	23.8148

## Sheet: 5C
Ext1 Change in Tone %Freezing Early-Late
	Paired
	F1	F2	F3	F4	F5	F6	F7	F8	F9	F10	F11	F12	F13	F14	F15	F16	M1	M2	M3	M4	M5	M6	M7	M8	M9	M10	M11	M12	M13	M14	M15	M16
	-5.48969	-22.4364	-28.7045	-13.5353	-15.5028	-5.66681	-9.4575	-33.8975	-24.125	-29.17	-26.9925	-2.875	-71.57	-30.3375	-50.3825	-12.7025	-5.41663	-45.9162	13.4646	-46.2045	-39.135	-26.4953	-50.92	-43.7378	-25.1257	-54.4875	7.51019	-0.1575	-17.44	-16.8425	23.98	-36.18
	Unpaired
	F1	F2	F3	F4	F5	F6	F7	F8	F9	F10	M1	M2	M3	M4	M5	M6	M7	M8	M9	M10
	-18.8275	-21.8331	-3.08338	-4.5	-20.6775	-8.71256	-39.906	-53.4691	-27.487	-43.4996	9.87594	-8.25	-12.04	-16.76	-9.7925	-3.57619	-13.7268	-26.8286	-54.8026	-46.1662
	Paired Reverse
	F1	F2	F3	F4	F5	M1	M2	M3	M4	M5
	29.5435	-1.643	21.0033	-7.82775	28.2048	35.3757	10.7601	19.1741	12.7886	19.6108
	Unpaired Reverse
	F1	F2	F3	F4	F5	M1	M2	M3	M4	M5
	-7.00025	-0.71425	-22.4736	-17.554	0.713125	10.2964	-22.8336	-22.9321	-6.31138	-12.6254
	Shock Only
	F1	F2	F3	F4	F5	F6	F7	F8	F9	F10	M1	M2	M3	M4	M5	M6	M7	M8	M9	M10
	-13.0424	-12.9165	-17.9119	-15.6666	-12.4955	-25.8791	-15.6696	-9.69919	-1.23975	0	-21.9953	30.4767	-6.94775	2.04913	-11.9999	-11.4166	-1.54607	3.74994	-4.41213	-14.4897

## Sheet: 5D
Ext2 Change in Tone %Freezing Early-Late
	Paired
	F1	F2	F3	F4	F5	F6	F7	F8	F9	F10	F11	F12	F13	F14	F15	F16	M1	M2	M3	M4	M5	M6	M7	M8	M9	M10	M11	M12	M13	M14	M15	M16
	-46.2423	-45.9869	-45.8825	-24.2725	-59.0419	-36.0829	-47.9775	-49.2086	-29.115	19.1238	-19.4166	-21.1085	-59.5828	-26.459	-8.415	-30.4725	-41.2498	-50.835	-39.215	-58.6663	-28.895	-20.9998	-60.2953	-14.9998	-9.24988	-30.583	-39.3331	-41.5	-53.4175	7.6625	-43.585	3.7725
	Unpaired
	F1	F2	F3	F4	F5	F6	F7	F8	F9	F10	M1	M2	M3	M4	M5	M6	M7	M8	M9	M10
	-9.575	-4	-11.4927	-20.415	-7.49538	-2.99994	-16.8329	-21.9998	-5.58331	-19.1665	-7.83325	-1.16669	11.2499	3	14.875	-14.3258	-24.146	-11.9498	-19.2498	-25.3754
	Paired Reverse
	F1	F2	F3	F4	F5	M1	M2	M3	M4	M5
	-10.8331	-11.2313	-17.2564	-22.7316	19.2444	-9.24969	-27.2695	0	-29.2823	7.04525
	Unpaired Reverse
	F1	F2	F3	F4	F5	M1	M2	M3	M4	M5
	0.453813	-0.83831	-19.7263	-13.4036	-19.7626	-7.00763	7.1995	17.0561	8.0475	13.1096
	Shock Only
	F1	F2	F3	F4	F5	F6	F7	F8	F9	F10	M1	M2	M3	M4	M5	M6	M7	M8	M9	M10
	-4.15931	-6.20182	3.24994	0	8.66662	-2.41663	-0.87575	2.91662	15.9538	-4.16663	-14.0833	4.28738	0	-5.65931	18.0372	-6.25	0	-3.33325	-0.41669	0

## Sheet: 5E
Ext1 Change in %Freezing from PreSCS to Tone
	Paired
	F1	F2	F3	F4	F5	F6	F7	F8	F9	F10	F11	F12	F13	F14	F15	F16	M1	M2	M3	M4	M5	M6	M7	M8	M9	M10	M11	M12	M13	M14	M15	M16
	34.7034	21.6324	36.7715	48.4272	-4.8337	44.2999	16.7613	38.7781	54.9669	30.33	52.8275	44.8856	28.7587	55.8069	5.56375	59.1394	36.1039	47.937	68.0349	56.9262	35.1875	39.4047	50.3169	18.5564	28.9099	49.5806	35.1078	54.5312	51.5112	48.9281	55.7987	47.5256
	Unpaired
	F1	F2	F3	F4	F5	F6	F7	F8	F9	F10	M1	M2	M3	M4	M5	M6	M7	M8	M9	M10
	6.74313	-3.24322	-8.85047	-11.8375	1.8225	-16.0474	-10.0254	-7.74581	0.119703	12.7033	-3.71847	-9.61938	-4.455	3.09125	-19.2956	-12.7966	11.5386	-16.1536	-19.9333	-17.409
	Paired Reverse
	F1	F2	F3	F4	F5	M1	M2	M3	M4	M5
	78.7509	56.5421	57.9186	86.0532	66.9386	49.5007	47.6939	66.9841	58.0913	42.1626
	Unpaired Reverse
	F1	F2	F3	F4	F5	M1	M2	M3	M4	M5
	-9.48763	-20.3667	-28.8777	2.19531	-15.6721	-36.0597	-12.8248	-4.48881	-11.0948	-27.9493
	Shock Only
	F1	F2	F3	F4	F5	F6	F7	F8	F9	F10	M1	M2	M3	M4	M5	M6	M7	M8	M9	M10
	-3.08414	3.07474	0.215876	-5.86428	-8.36247	-2.70517	-3.17019	-7.42253	1.57819	-13.9759	-4.75175	-10.4929	-36.6209	-8.8262	-11.0698	-10.6587	0.241687	4.34195	-5.14627	-6.69633

## Sheet: 5F
Ext2 Change in %Freezing from PreSCS to Tone
	Paired
	F1	F2	F3	F4	F5	F6	F7	F8	F9	F10	F11	F12	F13	F14	F15	F16	M1	M2	M3	M4	M5	M6	M7	M8	M9	M10	M11	M12	M13	M14	M15	M16
	22.3742	25.8744	35.0581	47.3069	37.919	25.3686	49.0619	39.5617	56.51	34.7168	44.1245	35.2438	37.2018	60.4813	53.9719	63.6931	30.3063	33.8831	54.5425	30.2456	51.3331	20.1591	42.6909	5.49256	16.8472	14.2499	33.0682	47.075	51.5344	52.3081	62.1587	48.7031
	Unpaired
	F1	F2	F3	F4	F5	F6	F7	F8	F9	F10	M1	M2	M3	M4	M5	M6	M7	M8	M9	M10
	-3.29125	-2.9583	-1.69109	-0.51188	0.935219	-11.6935	-7.02716	-2.11014	0.127094	-4.07475	-4.99997	-2.65866	2.12498	-14.7414	3.8775	-6.03577	-2.88461	1.52606	-2.37322	-20.5276
	Paired Reverse
	F1	F2	F3	F4	F5	M1	M2	M3	M4	M5
	82.4709	66.7869	68.4998	71.4323	74.1135	51.6697	55.849	85.5637	60.085	54.5017
	Unpaired Reverse
	F1	F2	F3	F4	F5	M1	M2	M3	M4	M5
	-4.14759	-26.92	-14.7558	-1.89505	2.04147	-2.72331	-4.97502	-22.1658	1.71498	1.5712
	Shock Only
	F1	F2	F3	F4	F5	F6	F7	F8	F9	F10	M1	M2	M3	M4	M5	M6	M7	M8	M9	M10
	-3.43242	-2.29567	4.06245	-2.39405	5.36303	2.10416	2.77933	-5.93744	-1.03239	-1.49302	0.259114	0.121784	-11.6807	-3.62686	-3.07825	-8.65925	0	-0.39584	-0.14477	-1.91664
