# Supplementary material for: Contributions of associative and non-associative learning to the dynamics of defensive ethograms
Source: eLife. 2024 Dec 16;12:RP90414. doi: 10.7554/eLife.90414 (PMC11649235; doi:10.7554/eLife.90414)
Supplement: Figure 6—source data 1. [file elife-90414-fig6-data1.xlsx]

## Sheet: 6A
WN Activity Index		WN=white noise			F=female, M=male
		Paired
	Trials	F1	F2	F3	F4	F5	F6	F7	F8	F9	F10	F11	F12	F13	F14	F15	F16	M1	M2	M3	M4	M5	M6	M7	M8	M9	M10	M11	M12	M13	M14	M15	M16
Ext1	1	2.96742	7.88257	0.637439	2.20783	1.4691	0.071701	3.88534	0.630688	2.95996	0.220698	3.11225	1.19027	5.86303	1.28911	1.69485	3.05212	2.0985	1.56878	2.97274	0.286269	5.91423	1.42039	0.98594	1.38472	2.32192	0.279998	0.324322	0.186907	2.94376	2.32115	1.14718	2.19936
	2	5.3073	3.96076	1.43725	0.387316	1.86928	0.844337	4.68487	1.45801	3.3288	0.170117	2.80979	1.16581	4.14272	0.239707	0	0.226476	2.06434	1.47391	3.08216	1.34147	1.80056	1.3056	0.829394	1.00681	2.78811	0.159328	1.08038	1.48042	4.05888	2.63467	0.982546	1.86812
	3	1.31248	4.57288	4.44111	0.310253	1.29453	0.239141	3.10782	0.255238	2.08067	0.356456	0.233391	0.207275	0.55615	0.06399	0.039907	2.13015	2.13047	0.977328	2.93949	0.315959	4.81982	1.24537	0.11516	1.37972	0.357683	1.2895	0.393188	1.6691	4.57823	0.267772	0.179434	2.78383
	4	2.23757	6.07864	1.88998	0.168746	1.90888	0.076045	4.58444	0.940449	2.07521	0.232732	1.47698	0.193012	3.35844	0.090357	0.866665	1.73422	0.213304	1.79623	1.10269	0.105442	3.99621	1.06495	0.930133	0.799531	1.2304	0.223151	0.878517	1.0711	2.61484	4.1332	1.45179	0.055391
	5	2.90691	1.72152	0.972797	0.109909	1.61714	0.579723	3.74422	0.782293	0.53433	0.211207	1.40204	0.106366	0.14924	3.01541	0.582279	1.19001	1.4867	1.10579	1.5988	0.135063	1.93698	0.776619	0.983103	2.15922	1.02502	0.143495	0.983524	0.541507	5.06179	0.120604	1.70278	0.57072
	6	2.07475	0.578791	2.11738	0.613433	0.336378	0.379326	2.74467	0.18131	0.18658	0.032492	1.28762	0.596054	1.90329	0.046023	0.095007	2.81767	1.04522	1.20799	0.17748	0.102304	1.68226	1.12128	0.247657	0.216541	1.13335	0.895409	0.105006	0.275504	2.17824	0.35875	0.039894	0.57832
	7	2.55892	2.94968	1.9745	0.763894	0.125708	0.074972	0.899988	0.599072	1.83195	0.037167	1.70888	0.443942	2.52489	0.312764	0.109966	1.67162	0.442525	1.217	1.74336	1.42258	1.95434	1.32798	0.655525	1.25398	0.233448	0.115876	0.828769	0.971607	2.4598	0.430323	1.50862	1.3141
	8	0.190994	2.64831	1.23902	0.17249	1.85459	0.596026	2.76192	0.242197	0.277671	0.34356	1.3672	1.00345	0.189407	0.171481	1.72541	0.313273	1.20735	1.01306	1.62679	1.11232	1.70124	2.4092	0.156441	0.99778	1.19971	0.543113	0.941858	1.05123	1.90328	0.211177	1.24175	0.315642
	9	1.74511	3.61044	0.074587	0.204405	0.375142	0.619835	5.40418	0.52693	1.54813	0.197447	1.47492	0.11932	0.201942	0.095878	1.48388	0.140093	0.843725	0.680925	1.74947	0.091913	1.94146	1.29519	0.105375	0.110024	1.23413	0.128459	0.100602	0.936739	3.13016	0.456458	0.241846	1.39198
	10	1.2826	2.12186	0.749307	0.130195	2.93211	0.119155	3.05917	1.20132	0.219599	0.373793	0.729757	0.104887	0.183175	1.80621	1.04699	0.443867	0.549571	1.51901	1.00876	0.215295	2.09607	1.12315	0.846363	1.31938	1.08034	0.128603	0.928728	1.36127	2.52138	2.03898	1.33777	1.581
	11	0.256783	2.16133	1.17355	0.283528	2.60951	0.053122	2.80296	1.02458	0.437741	1.20075	1.91747	1.08996	5.427	0.089215	2.2626	0.556197	1.13472	0.181341	0.581734	0.241394	2.29805	1.2545	0.382768	0.226392	1.65516	0.107339	0.890179	1.50608	2.45078	1.39285	0.133166	0.629753
	12	1.77916	2.29237	2.18215	1.07022	1.6579	0.710268	0.277697	0.167413	2.35014	1.30811	1.64195	0.994148	0.3666	0.12986	2.07917	0.20037	1.08443	1.14852	0.295501	0.120139	1.92113	1.30257	0.609397	0.426498	0.231709	0.236196	0.166549	1.10907	0.149235	0.205383	0.041683	0.193116
	13	0.282218	1.95188	0.292822	0.291552	1.97554	0.146575	2.8572	0.157275	0.453166	0.228888	0.14002	0.137866	0.289434	1.77133	1.16885	2.45716	0.804945	0.393103	0.115342	0.082603	2.04819	1.19634	0.908882	2.09056	1.35989	0.150329	0.113534	1.23935	1.80797	1.74409	0.038865	1.3611
	14	1.38924	1.45272	0.498064	1.44203	1.86331	0.193624	2.70797	0.158987	2.71522	0.129608	0.087609	0.457389	0.386221	1.79731	0.47862	0.158294	1.28306	0.845369	0.717207	0.054708	1.59732	1.16065	0.086882	1.6894	4.85275	0.383706	0.059415	0.156781	1.71111	0.14517	0.227602	0.210797
	15	0.068327	0.206056	2.37863	0.154324	1.91004	0.299408	1.50016	0.167822	0.711281	0.655851	0.211322	0.227283	0.741283	1.70001	2.59306	0.330486	1.28768	0.996243	0.089572	1.41586	1.03824	1.08303	0.837432	1.41823	1.34753	0.870593	1.53676	0.131203	4.02197	0.354652	0.082114	2.27232
	16	0.111944	0.331835	0.52896	0.855776	0.181044	0.763729	4.32421	0.191509	1.68998	0.125481	1.54783	0.154933	2.04769	1.59292	0.860522	2.22721	1.15786	0.710684	0.875987	0.362823	1.65341	1.18013	0.10372	0.212346	0.267355	1.06202	0.293246	1.46215	0.275976	0.743559	0.04696	1.7328
Ext2	1	1.38651	0.210582	0.304421	1.07367	0.986703	0.131921	1.87415	0.200193	0.81789	0.58278	0.284108	0.916846	0.846247	0.082575	0.97526	1.87216	1.13023	0.157677	0.328967	0.369027	1.19832	0.757652	0.095406	0.048297	1.03644	0.166372	0.757019	0.71469	0.373231	0.076104	0.089293	0.838974
	2	0.067851	0.322037	1.02788	0.928148	0.294471	0.089932	0.104114	0.304576	0.826773	0.144989	0.06214	1.05476	0.201788	0.700529	0.264895	0.171414	1.08884	0.132361	0.447616	0.152451	1.32776	1.32191	0.082975	0.742155	1.0661	0.059004	0.803374	0.297299	0.029271	0.87762	0.039303	0.136561
	3	0.665665	0.29076	0.085043	0.06386	0.305386	0.096714	0.490892	0.103817	0.098526	0.120443	1.11396	0.820377	0.522183	1.36579	1.42069	0.774285	0.559081	1.13637	0.89779	0.071422	0.786917	0.808199	0.890005	0.941247	0.120589	1.36319	0.052199	0.111229	0.157469	0.613434	0.042777	1.46172
	4	0.205941	0.002925	0.496602	0.166275	0.068231	0.583893	0.449213	0.114497	0.298655	0.241816	0.269677	0.078352	0.125762	0.12174	1.33242	0.085373	0.7269	0.053504	0.129223	0.199355	0.228729	0.895183	0.884477	0.959052	0.086105	0.057808	0.960303	1.01965	0.995117	0.267142	0.184937	0.659856
	5	1.01072	0.050373	0.384813	0.117898	0.735913	0.16534	1.2656	0.131119	1.01987	0.159228	0.04393	0.110319	0.186001	0.91147	0.673919	0.090635	0.58068	0.08974	0.329322	0.070515	0.062724	0.859306	0.651478	0.15135	0.095484	0.137517	0.06054	0.052298	0.032678	0.061327	0.098622	0.150509
	6	0.732451	0.137432	0.068972	0.428622	1.40822	0.207784	0.392866	0.140837	0.183703	0.12248	0.103104	0.22702	0.11683	0.52124	0.14825	0.126778	0.343256	0.114947	0.660715	0.177874	1.29694	0.808396	0.139262	0.136578	0.068782	0.080892	0.177473	1.29636	1.14108	0.094843	0.052834	1.04022
	7	1.14227	0.081466	0.225127	0.223195	0.895951	0.212558	1.96015	0.169723	1.04115	0.902254	0.362805	0.271646	1.64714	1.32233	0.04908	0.113886	0.593919	0.763672	0.525236	0.187686	1.16573	1.21653	0.411392	0.457991	0.61633	0.079217	0.071773	0.103697	1.59278	0.27209	0.201016	0.046879
	8	0.092474	0.067759	0.258014	0.589288	0.793036	0.088161	0.222186	0.1373	0.420074	0.09295	0.490125	0.442555	0.525091	1.38636	1.27996	0.138807	0.12562	0.118971	0.169231	0.099678	1.2785	0.894955	1.10762	0.478287	1.04293	0.114715	0.086322	0.094122	0.019122	0.206456	0.163797	0.507788
	9	0.049893	0.311255	1.15057	0.1128	0.782111	0.041837	0.153518	1.44208	0.26351	0.049289	0.264217	0.247964	0.185193	0.067566	1.69847	0.089661	1.35685	0.12038	1.11423	0.060976	0.219418	0.058193	0.136936	0.223153	0.803992	0.895931	0.586192	1.90494	0.036085	0.250258	0.402528	0.130024
	10	1.0229	1.2289	0.148541	1.32886	0.116823	0.08089	2.76737	1.20946	0.166131	0.146544	0.401925	0.127244	0.170076	1.25199	0.11093	0.309775	0.94015	0.18945	0.619169	0.339366	0.035636	0.142359	0.327638	1.13204	0.077699	0.569465	0.07141	0.090486	0.027149	0.217383	0.062561	0.17507
	11	0.700488	0.335044	0.505844	0.150144	0.734351	0.710787	0.659665	0.232898	0.196077	0.219932	0.054481	0.087882	0.20945	1.34259	0.057049	0.294823	0.336954	1.17961	0.436641	0.345529	0.690627	0.892935	0.097744	0.881333	0.101246	0.351717	0.323638	0.425355	0.031893	0.525784	0.363886	1.88234
	12	0.260125	0.110847	0.11432	0.855011	0.09624	0.070886	1.9203	0.161405	0.459733	0.116692	0.548915	0.329214	0.829953	1.17086	0.103369	0.143931	0.102151	0.147452	0.552968	2.01188	0.067694	1.28636	1.04205	0.772904	1.31921	0.127369	0.162289	0.170873	0.0325	0.404939	0.154864	0.267925
	13	0.074637	0.114895	0.1912	0.12801	0.542115	0.086575	0.300266	0.818285	0.577004	0.058006	1.24268	0.922376	0.255033	0.111949	0.03318	0.390164	0.781585	0.730582	0.350665	0.063128	0.686485	0.766748	0.300706	0.683121	0.722651	0.304353	0.130497	0.097813	0.026578	0.225447	0.160852	0.330147
	14	0.511601	0.113791	0.092657	0.145199	0.048703	0.1066	0.079155	0.327379	0.15876	0.125517	0.458797	0.161842	0.241116	0.193863	1.42267	0.20157	2.08824	0.561235	0.597531	0.584651	0.099537	1.31679	0.192443	0.374936	1.34554	0.095572	0.558684	1.59778	0.033695	0.248517	0.187087	1.32436
	15	0.60568	0.27135	1.09695	0.08081	0.056768	0.086221	2.77583	0.65572	0.228268	0.054309	0.695655	1.09535	0.305878	1.269	0.113127	0.138919	0.729874	1.26154	0.888487	0.168017	1.67271	1.07642	0.693446	0.608881	0.670482	0.283142	0.10034	0.184402	1.87723	0.296396	2.4597	0.560985
	16	0.404219	0.179324	1.15154	1.26852	0.882875	1.64753	0.150169	0.354469	0.61493	1.18861	1.3011	0.442218	0.099082	0.965505	1.09768	2.13354	0.969345	0.123416	0.435059	0.100992	0.372683	0.925083	0.156989	0.414771	0.120427	1.19762	0.638315	1.23685	1.64599	1.49422	0.392702	0.369805
		Unpaired
	Trials	F1	F2	F3	F4	F5	F6	F7	F8	F9	F10	M1	M2	M3	M4	M5	M6	M7	M8	M9	M10
Ext1	1	1.65055	1.7377	1.14289	5.23153	1.05575	8.38461	2.51134	3.07002	2.14454	0.387145	3.9575	4.06449	1.61356	2.08139	3.0663	0.667576	0.649717	4.63797	2.80524	2.91437
	2	1.97246	2.41434	4.3354	4.34178	0.230966	2.36388	2.24718	1.13617	1.21825	0.518366	0.890817	2.68976	2.66505	0.650551	3.42966	3.17422	3.02724	3.30916	2.84471	3.8394
	3	0.907664	1.26094	4.06858	0.88994	1.7035	3.742	0.479514	0.924982	2.72515	0.506758	1.76541	2.38255	2.03063	2.2942	2.70187	0.608783	5.8481	3.09023	2.2198	2.17266
	4	1.80713	0.136357	3.0909	4.66188	1.44683	7.53519	0.578844	0.944827	1.75706	2.35002	4.71629	1.95258	4.25662	0.169217	1.0539	1.33563	4.45749	4.32697	2.77707	4.30087
	5	0.614863	0.274748	1.77348	0.881214	1.14093	1.53946	2.29806	4.49337	1.99432	3.87781	0.764723	1.97232	2.73462	2.11337	0.735625	2.63801	3.65668	3.29917	5.24569	2.23601
	6	2.51701	0.805878	0.726208	2.93421	0.47581	4.76612	1.63685	0.866512	1.17138	5.38591	4.48977	2.52375	1.74913	0.32388	1.77019	4.21445	2.68067	4.32554	3.69786	5.45885
	7	2.65874	1.47186	2.82319	3.37496	1.17977	5.43507	6.63065	2.8011	1.81698	0.212184	1.21954	2.05762	1.29673	0.351931	4.64787	0.615114	3.33331	1.42723	1.05003	4.69831
	8	1.93656	2.37656	2.2318	3.8929	2.19258	6.04415	8.3083	0.575882	0.827427	3.29755	4.11031	2.0255	2.10902	2.1277	2.91784	5.17141	3.21703	3.14724	3.84832	2.0675
	9	0.203335	1.99499	1.21847	3.29422	0.677048	7.90605	7.56141	6.05217	2.36215	2.90003	0.876367	4.29562	1.65924	3.10796	3.92028	1.11105	3.72282	2.53539	7.59048	4.47261
	10	2.28404	1.03428	2.69178	5.06358	0.563234	3.56986	6.4947	1.54533	3.1484	0.32509	3.15935	2.01406	1.89465	2.27719	1.59419	0.305509	2.3785	1.04315	4.52544	3.48142
	11	3.37243	1.0957	2.49784	4.41751	1.10152	1.11475	8.9415	0.621013	1.32041	2.07322	1.66034	3.18535	2.15616	2.95443	2.97111	2.89313	0.716288	2.95392	5.75696	1.6106
	12	1.99007	0.475548	2.05207	5.04765	1.90468	0.414546	6.48035	0.40047	0.545413	2.34512	4.08589	2.06164	1.76645	0.187717	2.71046	2.8694	3.84414	3.48389	3.85023	1.34243
	13	1.43732	0.937022	3.01748	1.09647	2.33685	2.44158	0.920931	4.81353	1.59064	1.34464	1.75863	1.13215	0.59692	0.39112	2.07662	0.91344	4.04413	5.52576	1.15088	4.58657
	14	0.480273	2.34601	2.50655	5.43365	2.36054	5.38144	4.36207	8.55415	2.34781	1.81121	3.96965	2.73933	2.17761	2.54923	2.68185	0.680079	3.65468	1.05413	5.73495	2.51718
	15	2.72368	1.62593	3.16663	3.65634	1.95955	6.10707	9.29768	1.00582	2.16468	4.71585	1.25804	0.490133	2.87131	2.61467	0.591399	3.4494	4.31117	6.37253	3.59345	2.82817
	16	2.05264	1.45171	2.51027	3.71673	2.18566	0.573051	9.6816	0.855959	2.13577	3.71252	0.845974	2.09174	1.7304	1.54692	2.42745	0.844858	4.27935	3.84697	4.79139	4.82733
Ext2	1	1.17732	0.127099	1.02197	2.51757	0.959333	2.98725	1.52529	3.15307	1.93231	3.092	1.8635	0.853038	0.170603	0.338889	0.826909	1.73105	1.68003	1.55467	1.95582	3.50164
	2	1.44873	1.52973	0.336604	2.12314	1.01533	2.14551	0.111041	0.330586	3.64717	0.618212	0.404207	1.93986	1.49682	2.32247	0.32628	0.459368	0.952742	0.984504	2.124	2.13394
	3	1.38305	0.169451	1.23406	1.93496	1.20614	3.49468	0.150516	0.26562	0.30112	0.224608	0.636167	1.26161	1.88644	2.55701	1.30059	1.90427	1.53798	1.17863	2.48977	0.840982
	4	1.23471	1.52471	1.50279	0.288493	0.996469	3.56544	1.50014	1.58201	3.25926	0.245246	4.8336	1.49886	1.75983	2.40423	1.15744	1.39507	0.289295	1.6854	1.84092	2.22739
	5	1.6004	1.68432	1.60934	0.671356	1.31321	3.00813	0.944893	0.426336	2.79535	1.74984	3.03567	1.60983	1.19832	0.295012	1.29946	0.908263	1.39477	0.865392	1.73728	0.930169
	6	0.696329	0.516144	1.71731	0.447116	0.858274	0.85229	0.992968	2.28971	2.86418	1.80743	3.15986	1.46744	1.47889	2.80947	1.26933	0.629362	1.11962	1.85935	1.73105	2.83625
	7	1.88947	0.893561	1.60202	1.23771	0.505321	2.57338	1.80017	2.31285	1.75874	2.2156	2.18459	0.72894	1.17504	1.43355	1.41097	2.1547	1.8237	1.22946	1.81025	2.57871
	8	1.70422	1.55868	0.833077	2.00028	1.63237	3.43951	0.85836	1.52144	2.76496	3.43161	0.471902	2.34165	1.42512	2.50568	1.13716	1.35499	0.884427	1.89966	2.47889	1.22368
	9	0.281987	1.66784	1.75513	2.82919	1.16144	2.6016	1.64715	0.542208	3.79907	3.57768	3.46829	1.80044	0.970863	0.932454	1.11218	0.330829	1.21221	1.58821	1.91883	4.11773
	10	1.53001	1.7618	1.41814	2.10271	1.23921	3.79508	2.02471	4.0812	3.57977	2.34399	4.63022	3.35016	0.288939	2.25143	0.275363	1.20813	2.01603	1.00608	1.44446	4.24933
	11	2.27429	0.924549	1.28152	1.99525	0.200263	2.11333	1.46806	0.67636	2.28588	0.529014	1.10999	2.63819	1.54393	2.50911	1.41638	1.98415	1.68577	0.749793	1.95817	0.558263
	12	0.177635	1.16106	1.39033	3.79739	0.898234	1.64372	1.29262	0.719415	1.09893	2.48354	3.21987	0.219003	2.03921	1.72587	1.70819	1.70079	0.551906	1.28086	1.41851	3.41921
	13	1.09797	1.27485	2.32253	0.724257	2.36654	2.80874	1.46594	2.27547	2.52941	3.89318	3.59587	1.70156	2.51505	2.14979	1.16904	1.49394	1.91842	0.326917	2.10194	4.00605
	14	1.95915	1.74809	1.60495	3.6706	1.02479	2.03185	0.312916	3.7173	0.339638	1.25699	2.97763	1.41407	2.29303	0.526566	2.04558	1.61384	1.63787	1.4886	2.44417	2.8078
	15	1.68267	1.37771	2.23892	0.538996	0.939795	3.27068	3.21924	2.94749	3.32083	1.81294	3.06116	1.3606	2.57933	1.47352	0.798519	1.03811	0.886951	1.15896	1.80925	3.30093
	16	1.43937	1.63945	2.01095	0.859053	1.03688	2.40128	0.73178	1.55977	1.24921	2.47781	2.11714	0.732349	1.55194	2.33456	1.49206	1.19983	1.09739	1.8039	0.498486	3.59105
		Shock Only
	Trials	F1	F2	F3	F4	F5	F6	F7	F8	F9	F10	M1	M2	M3	M4	M5	M6	M7	M8	M9	M10
Ext1	1	1.6062	2.25141	2.5636	0.917217	1.89323	2.23593	4.08111	1.65523	1.75882	1.10342	2.12454	4.89319	0.489997	2.68273	1.14546	1.69996	1.91978	0.172817	2.16897	1.03788
	2	0.636091	0.228185	1.2648	2.3657	3.71718	2.59	0.727361	1.43219	1.08052	0.939861	1.33407	4.58222	1.9562	2.14188	0.527605	1.56116	0.316508	0.873592	2.68541	1.32784
	3	2.26056	2.60192	2.58372	1.03787	1.74667	3.11641	1.1615	2.70891	1.62446	1.65657	1.03197	3.19961	0.257088	1.83022	0.606636	2.43176	1.35465	1.02209	3.34591	0.155129
	4	0.416021	0.421942	3.66628	2.41473	3.26379	1.8352	0.835399	1.04944	1.56172	1.75435	1.9091	2.33104	2.17339	2.30207	1.04304	2.66159	1.12193	1.35947	1.96323	1.23004
	5	1.24897	1.84862	2.13307	1.12137	2.61402	2.47928	0.41816	1.24019	0.856529	2.50446	1.50645	4.83603	4.66017	1.37175	1.3464	3.00795	0.540414	1.43739	3.54177	2.07252
	6	0.245905	2.43749	3.2745	2.69336	2.6788	3.03654	0.477988	1.57581	1.80021	2.00228	0.363216	1.74433	0.583131	2.3788	1.61704	2.94691	3.64902	2.12381	0.91791	1.5068
	7	0.569376	0.941636	2.23274	1.22439	3.32217	3.19286	0.781274	0.645139	0.979719	2.67694	2.66223	2.78428	0.955424	2.62251	1.69854	1.78974	0.872984	0.892634	3.72717	1.65825
	8	2.44259	2.21609	2.09908	2.93003	2.13604	2.81839	5.69752	2.12206	1.0693	1.37996	0.462893	2.64635	1.23046	2.19847	1.97291	2.1094	1.32705	2.06994	2.37567	2.04401
	9	2.45688	1.19352	2.5314	1.99417	2.51582	4.93142	5.30136	2.27271	1.78787	2.77093	3.24495	2.66784	3.3267	2.49566	0.593476	2.81445	1.74104	1.52067	1.08784	1.32722
	10	0.468808	0.33268	2.20478	2.31846	1.39061	2.60962	5.77111	2.21551	0.754279	1.88915	2.15974	2.82407	3.50755	1.93763	1.33571	1.34147	1.44237	1.12771	3.73166	2.01233
	11	0.652068	2.55316	0.810423	1.96892	2.82713	2.10781	3.92982	2.89585	1.64443	1.99686	0.620929	2.50657	4.43783	2.06986	1.38115	2.10615	2.04749	1.59547	3.26401	1.59034
	12	0.610828	1.97227	5.55996	1.76954	0.713345	2.73855	1.86088	2.46338	1.07089	1.9199	0.835168	0.824385	2.48708	0.364437	2.00498	2.13125	2.38912	1.10334	3.36133	2.09512
	13	4.64319	2.32616	2.8067	1.54154	1.92464	2.46232	3.02605	1.96547	1.66052	1.73119	2.25397	2.98177	4.29188	1.77029	2.12728	2.78875	2.21025	1.11243	2.98998	2.81722
	14	0.988714	1.53386	2.90971	1.96516	2.36437	2.51428	2.37	2.08782	1.25972	2.30331	0.173813	2.9595	1.59869	2.18348	1.53103	2.55619	1.51962	1.79939	3.48775	0.452501
	15	0.410866	1.19775	0.765096	2.41172	2.47174	2.92435	1.47959	2.01341	1.45358	2.21999	1.78423	1.34658	0.560487	2.18147	3.62437	2.19292	3.22475	1.62912	3.27866	2.86749
	16	3.51589	1.68553	2.35093	2.01897	1.71194	2.39689	7.07241	2.52909	0.338331	2.21428	2.25928	0.891149	3.02577	1.18047	1.10888	3.0669	0.671834	0.782443	3.18762	3.89409
Ext2	1	0.38395	1.69682	1.12914	1.41007	0.785881	2.32894	1.40776	2.00562	2.52194	1.65047	2.05972	2.68353	0.153063	1.227	1.51045	2.13578	1.42488	0.130972	1.03933	1.53719
	2	2.45949	1.15855	1.25356	1.68684	1.21844	1.28919	0.156037	0.810835	1.72662	0.412772	2.56857	2.64979	3.02386	2.19846	1.23084	1.29633	1.37175	0.757264	1.80009	1.76592
	3	0.321871	0.812588	0.703687	0.689961	0.850739	1.40598	1.28564	1.04973	0.703564	1.7517	2.9516	1.41584	0.965813	2.7007	1.48076	0.141491	0.84391	1.24465	2.15054	1.40703
	4	3.00268	1.37853	0.99992	1.33131	0.725394	0.912838	0.677161	1.33556	0.984158	1.42153	2.12677	0.551148	3.21248	1.91046	1.2911	1.75923	1.21727	1.67269	0.863966	1.94999
	5	0.565121	0.855168	0.700473	0.720786	1.51601	0.954458	0.406602	1.38205	0.545799	1.44541	0.547058	0.745969	2.35401	1.54972	0.959997	1.65905	1.25022	1.55313	2.92187	1.56317
	6	3.19457	1.43936	1.19784	1.10476	1.74889	1.53502	2.3468	1.87922	1.72135	1.19	1.51021	1.85977	0.324502	2.12204	1.1505	1.00887	1.09304	1.51216	2.28875	1.87256
	7	0.31386	1.69858	1.7495	1.63276	1.14044	0.757435	0.338545	0.969939	0.854081	1.62682	0.366258	4.55538	1.89405	2.33617	0.982123	1.83031	0.907057	1.26572	2.14037	1.37008
	8	2.57649	1.05569	0.796184	1.78592	2.09593	1.41433	1.82455	1.23883	1.11201	0.631061	1.49607	0.797583	2.13658	1.53906	1.72986	2.49008	1.07217	1.53494	1.05289	1.70226
	9	0.183747	1.82438	1.2767	1.21523	1.27094	1.6142	0.992287	0.667818	0.279531	2.49144	1.34511	1.00184	3.12349	2.1719	1.74398	1.7836	1.566	1.90111	1.03743	1.49518
	10	2.30838	0.500938	1.89477	2.55619	1.42464	1.94394	2.8609	2.36969	1.77336	1.87901	1.70602	2.05015	2.09443	2.57368	0.935675	0.654687	1.37465	0.860977	2.02663	2.4342
	11	0.481042	0.406371	2.28091	2.39747	0.974129	1.60589	0.850177	0.515974	0.967435	2.03062	0.515031	0.747714	3.06699	2.35193	0.888723	1.03353	1.24553	1.52218	2.90847	1.33291
	12	2.74726	1.43834	0.450709	2.00683	1.39519	1.53681	1.146	2.52455	1.08026	2.36549	2.29508	2.20687	3.00456	2.20563	1.2607	0.856451	0.79755	0.343468	2.61118	1.30524
	13	0.930752	2.40947	2.43614	2.01599	1.14172	1.6746	2.07628	1.16283	1.1823	0.987691	0.900982	2.46073	1.45521	2.24367	2.22805	1.01404	1.47187	1.56079	1.60254	1.90241
	14	1.50237	2.34716	1.99133	1.19798	2.32566	1.27467	0.973924	1.52301	2.079	1.3854	1.34792	2.16882	0.472187	2.10848	1.34964	0.922725	0.700872	1.43903	1.93393	1.25174
	15	1.99134	1.39906	1.47331	1.42681	1.50493	1.58961	1.38732	0.628279	1.73477	1.62096	1.90698	1.69207	2.0812	3.46967	1.23213	0.746992	1.31761	0.563127	1.35066	1.4553
	16	1.58002	1.9036	2.32439	1.28203	1.92308	2.02792	2.14968	1.8957	1.93193	0.259661	1.18575	3.42535	3.26684	1.32513	0.331799	2.02866	1.56727	1.54432	2.24354	0.381481

## Sheet: 6B
WN activity index		WN=white noise		F=female, M=male
		Paired Reverse
	Trials	F1	F2	F3	F4	F5	M1	M2	M3	M4	M5
Ext1	1	0.323159	1.64807	1.90148	0.064591	0.170277	0.214519	0.625656	0.244452	2.30314	1.13095
	2	0.120569	1.97433	0.240011	0.304891	0.288238	0.225455	0.174964	0.217179	0.252161	0.199221
	3	0.45156	1.30872	0.145698	0.214198	0.233401	1.56775	0.692403	0.348916	0.228871	1.66976
	4	0.227067	1.63823	0.135968	0.063186	0.784375	0.159067	0.117523	3.67761	1.4927	1.19171
	5	1.13985	0.403469	0.097858	0.266033	0.129114	0.669746	1.04178	0.148376	0.18934	0.120568
	6	0.069115	0.168752	2.50067	0.200837	0.239517	1.53555	0.978313	0.146547	0.125324	0.511608
	7	1.41309	1.82011	1.76619	0.485257	0.910367	0.194455	1.26254	2.1701	0.154542	0.957573
	8	1.5284	0.916651	0.469682	1.51677	0.126576	1.15376	0.315024	1.29621	0.378891	0.832487
	9	0.869357	1.11535	0.568833	1.08432	0.21993	0.195593	0.68403	0.327581	0.281514	0.280246
	10	0.071736	0.27397	0.410451	0.90477	0.127672	0.420392	0.663577	4.18368	0.226951	0.087113
	11	0.096668	1.50177	1.6396	0.218957	0.268395	0.096747	1.38743	0.084338	0.873625	0.175364
	12	1.42043	0.401977	0.70264	1.03521	0.850456	0.438079	1.18683	0.134291	0.224213	1.51106
	13	1.19368	1.4325	0.474446	0.110868	0.957829	0.121331	1.16634	0.10115	0.798176	0.616634
	14	1.18552	0.217223	2.25205	0.260978	1.297	0.328967	0.810769	0.100494	1.82108	0.246936
	15	0.168388	0.577141	0.178582	0.17401	0.15456	0.964272	1.18485	0.146374	0.152273	0.871389
	16	0.56292	1.39303	1.68346	0.471659	0.243587	0.401072	0.575147	0.133463	1.29415	0.264897
Ext2	1	0.8178	0.704287	0.296526	0.377564	0.168583	0.178004	0.676768	1.58505	0.043471	0.883583
	2	0.05998	0.286019	0.170176	1.13076	0.271656	0.396301	0.250762	0.064563	0.248727	0.174959
	3	0.221064	0.194779	0.698945	0.083969	0.095358	1.14461	0.709164	1.43979	0.934244	0.870889
	4	0.236379	0.790627	1.43784	0.124574	0.401565	0.361035	0.747849	0.063629	1.45724	0.844141
	5	1.12895	1.66399	0.226692	0.863746	0.12419	0.759856	0.876421	0.049847	1.04186	0.17695
	6	0.162869	0.492243	1.21644	0.084862	0.100979	1.31558	0.725526	0.864214	0.1686	0.938506
	7	0.231419	0.140354	0.436751	1.68209	0.130215	1.06674	0.834914	0.062429	1.04627	0.750417
	8	1.62294	0.255666	0.647962	1.52529	0.226088	0.817441	0.868332	0.150624	0.471551	0.236422
	9	1.21202	0.663081	1.32598	0.301058	1.12855	0.228362	0.801444	0.869663	1.32785	0.370333
	10	0.866498	0.192148	1.76505	0.865261	0.370847	1.01394	0.824452	1.34163	1.07947	0.341785
	11	0.623768	0.93399	0.48632	0.172427	0.190828	0.173726	0.892773	0.458655	1.14418	0.885613
	12	1.67351	0.135964	0.156335	1.16516	1.01184	0.075308	1.11081	0.111893	0.637772	0.205716
	13	0.682132	0.266535	1.76903	1.35066	1.8588	1.23412	1.94877	0.095844	1.09192	1.07585
	14	0.11781	1.54475	0.559208	1.20717	2.02704	0.087867	0.80761	1.75146	1.52517	1.17764
	15	1.29462	1.79943	2.68358	0.768662	1.27483	0.170126	0.960591	0.079612	1.66583	0.770023
	16	0.963373	1.00405	1.40178	1.31372	0.169517	0.952246	1.54943	0.48297	0.998456	1.09951
		Unpaired Reverse
	Trials	F1	F2	F3	F4	F5	M1	M2	M3	M4	M5
Ext1	1	0.90886	8.39177	0.442692	2.17367	2.60665	38.8905	0.298675	1.30513	3.14749	1.62871
	2	0.291034	4.92077	1.50783	3.07373	1.89335	26.9979	1.9745	0.509729	3.44721	2.45284
	3	1.09223	4.92091	3.22351	0.491487	2.68819	34.5849	2.09325	0.907287	2.0163	3.87119
	4	1.38275	3.46177	5.69881	0.361068	3.4165	28.2458	0.846862	1.8488	2.88128	1.57175
	5	2.92898	1.569	1.55278	0.328507	1.8478	22.2742	1.92145	1.3142	0.897671	0.848861
	6	0.523474	8.17218	3.16216	0.4136	1.50879	53.6706	2.99149	1.64541	1.73006	4.60664
	7	2.22956	7.6567	2.48188	0.785494	1.36688	4.89256	1.69942	3.73702	1.97144	5.31641
	8	0.635882	0.678941	3.29322	0.374585	2.03392	26.7795	1.10824	3.89595	4.1437	3.35961
	9	1.4981	8.53636	1.9407	3.17022	2.64826	17.6388	1.79441	2.36576	3.28424	4.63561
	10	2.49708	0.660824	1.67525	2.1093	2.43898	29.3091	1.93976	4.72699	2.41601	4.87141
	11	0.845582	3.46738	4.55062	0.385554	0.568965	7.9292	3.92095	0.420011	0.325654	1.34892
	12	2.40728	4.76599	3.78753	0.277219	0.973803	40.2623	2.57607	0.386913	0.623179	3.19082
	13	2.15714	2.9266	6.37667	3.12024	0.269827	12.3067	2.16543	0.567887	0.881431	2.96584
	14	2.61046	1.09379	2.46374	1.3094	2.09391	5.37276	3.51663	2.34701	3.68321	4.27438
	15	3.33901	0.500643	0.661686	0.156034	3.64087	27.31	2.05085	2.62282	1.50935	1.93541
	16	2.16279	4.64566	3.49138	0.531429	2.00123	13.6753	4.19973	3.15268	0.640835	2.49201
Ext2	1	1.93061	7.54075	3.18673	1.74273	0.304839	1.55258	2.43762	1.73064	2.74352	2.2731
	2	0.652319	3.54608	2.91806	1.61336	0.532624	2.46195	3.07091	9.20856	4.93228	2.98047
	3	1.57195	3.31317	1.41357	1.36761	0.140952	0.356713	2.31995	1.54041	0.603614	2.30966
	4	2.59884	2.90932	0.320376	0.493311	0.286267	0.473202	2.29155	5.07438	4.2773	2.63396
	5	2.12075	2.17566	2.28405	2.73634	0.618873	1.61489	1.77028	8.47031	0.584891	0.728583
	6	1.88452	3.61653	0.1563	0.456661	1.46243	2.54398	2.11803	1.78314	0.396778	0.840732
	7	4.03451	3.29284	2.27075	0.647064	0.186595	2.12091	2.72311	0.612462	2.4882	1.05328
	8	2.20515	1.05712	1.96549	0.293618	1.05365	2.38401	2.35102	3.31298	4.60237	1.86767
	9	2.59322	6.00166	1.92832	3.16602	1.10194	4.50213	1.27091	4.59581	0.55645	1.78086
	10	2.11379	0.645791	2.18428	0.268859	0.400058	5.16352	1.69492	1.81132	3.72695	2.47951
	11	3.38799	2.90987	2.34325	2.62742	1.94186	1.56663	2.3664	5.61037	5.64894	2.19268
	12	3.17159	2.42763	4.62842	0.623188	3.05371	0.529011	2.00271	6.13405	1.23817	1.97812
	13	4.12716	3.27674	2.09079	1.6574	3.09455	2.04283	1.20399	3.42447	3.71757	2.08177
	14	0.26169	0.538227	3.00155	2.42884	2.12949	3.63729	1.58148	0.597325	0.434732	2.75591
	15	2.93558	3.7235	1.55854	1.53166	2.0483	2.84898	2.74314	3.68012	2.80991	0.11245
	16	3.76872	4.54995	2.94839	2.25752	2.24865	2.46756	0.253803	0.911365	1.00086	0.800578

## Sheet: 6C
Ext1 Change in WN Speed Early-Late
	Paired
	F1	F2	F3	F4	F5	F6	F7	F8	F9	F10	F11	F12	F13	F14	F15	F16	M1	M2	M3	M4	M5	M6	M7	M8	M9	M10	M11	M12	M13	M14	M15	M16
	-2.20898	-2.10767	-0.24667	-0.13901	-0.21874	0.13108	-0.71755	-1.75205	-1.08654	0.08489	-0.74258	-0.87203	-1.74478	1.8134	0.8884	-0.51498	0.608625	-1.01716	-1.65247	-0.06364	-1.73306	-0.23016	-0.58607	0.407067	0.56265	0.269267	-0.34023	-0.67036	-1.31887	-0.78042	-1.25413	-0.10411
	Unpaired
	F1	F2	F3	F4	F5	F6	F7	F8	F9	F10	M1	M2	M3	M4	M5	M6	M7	M8	M9	M10
	0.1289	0.418925	-0.40285	-0.22173	1.8809	-1.15366	1.76723	1.14932	0.137358	2.42012	-0.72213	-1.68515	-1.1142	0.660433	-0.71571	0.015908	0.3546	0.300592	0.726292	0.304475
	Paired Reverse
	F1	F2	F3	F4	F5	M1	M2	M3	M4	M5
	-0.58709	0.844875	-0.10451	0.040142	-0.54204	-0.83543	-0.15967	-0.19298	0.869025	-0.0322
	Unpaired Reverse
	F1	F2	F3	F4	F5	M1	M2	M3	M4	M5
	-0.26333	0.5328	1.57777	0.528483	1.23839	-0.62648	1.76566	0.405992	-0.0239	1.8792
	Shock Only
	F1	F2	F3	F4	F5	F6	F7	F8	F9	F10	M1	M2	M3	M4	M5	M6	M7	M8	M9	M10
	1.28257	0.461258	-0.35826	0.564575	-0.07847	0.176817	1.68037	0.742375	-0.80332	1.28357	0.028783	-1.84744	1.27311	-0.71472	2.37842	1.02813	1.26221	1.24593	0.846217	2.85116

## Sheet: 6D
Ext2 Change in WN Speed Early-Late
	Paired
	F1	F2	F3	F4	F5	F6	F7	F8	F9	F10	F11	F12	F13	F14	F15	F16	M1	M2	M3	M4	M5	M6	M7	M8	M9	M10	M11	M12	M13	M14	M15	M16
	-0.45078	-0.06656	0.262625	-0.29782	-0.10213	0.506067	0.131942	0.844042	-0.15805	0.156925	1.11157	-0.1165	-0.287	0.129225	-0.56875	-0.01168	0.754108	0.545258	0.263767	0.0458	-0.35728	0.243	-0.41702	-0.37484	0.367408	0.138725	-0.63031	0.43315	0.947633	0.156517	0.716375	-0.15594
	Unpaired
	F1	F2	F3	F4	F5	F6	F7	F8	F9	F10	M1	M2	M3	M4	M5	M6	M7	M8	M9	M10
	0.501283	1.53022	2.17988	-0.33345	0.706458	-0.53098	1.10311	1.68467	-0.52693	1.76741	0.80055	-0.15846	1.98972	-0.43644	1.17358	-0.06132	0.406642	-0.32318	-0.62848	1.28945
	Paired Reverse
	F1	F2	F3	F4	F5	M1	M2	M3	M4	M5
	0.421858	0.455758	0.797067	0.236017	-0.01492	-0.60336	0.374933	-0.0121	0.293242	-0.02517
	Unpaired Reverse
	F1	F2	F3	F4	F5	M1	M2	M3	M4	M5
	0.39	0.053908	1.74705	1.33347	1.97674	1.2642	0.003833	0.59805	-1.16411	-0.8033
	Shock Only
	F1	F2	F3	F4	F5	F6	F7	F8	F9	F10	M1	M2	M3	M4	M5	M6	M7	M8	M9	M10
	-0.06293	1.96463	2.03893	0.439183	1.76497	0.370142	1.43758	0.004592	0.57575	-0.48123	-2.0614	0.771092	-0.0267	0.472125	-0.23396	-0.39543	0.161192	0.761633	0.637458	-1.0691

## Sheet: 6E
WN %Freezing			F=female, M=male
		Paired
	Trials	F1	F2	F3	F4	F5	F6	F7	F8	F9	F10	F11	F12	F13	F14	F15	F16	M1	M2	M3	M4	M5	M6	M7	M8	M9	M10	M11	M12	M13	M14	M15	M16
Ext1	1	9.02	0	3.35325	0	2.02	7.02	8.69	2.35	2.35	15.67	0	2.69	5.69	5.35	0.35	3.69	0	8.6865	0	1.68675	7.02	0	3.02	0	0	20.69	3.68675	5.69	0	17.69	0	13.67
	2	0	0	0	0	16.3642	4.6975	5.36	5.03	0	17.69	0	5.7	11.66	13	100	8.7	7.36425	0	19.364	1.69775	6.7	2.36425	27.03	2.69775	0	18.7	13.6975	4.03	9.03	27.36	20.69	21.7
	3	13.3763	0	0	8.7095	0	6.7095	6.04	4.71	4.38	0.04	0	6.38	0	59.71	66.29	14.37	5.043	9.043	16.0428	46.7092	12.38	1.37625	27.71	20.0428	6.043	4.04	3.37625	10.67	8.71	25.04	0	3.38
	4	6.7195	1.71975	6.053	6.7195	6.053	7.38625	0	5.05	18.39	19.72	0	4.05	5.72	9.05	0	22.05	5.38625	0	3.053	42.0525	24.39	24.0527	33.39	3.053	0	26.72	72.3855	46.05	7.05	12.33	29.05	38.05
	5	13.7275	0.72775	7.39425	9.061	0	7.7275	10.39	4.06	4.06	8.39	3.73	3.06	47.72	0	0	3.73	0	7.39425	54.7272	5.39425	2.73	0	29.06	7.39425	6.061	2.39	6.39425	5.73	0	14.73	59.39	36.06
	6	17.7365	0	9.7365	0	0	6.40325	7.07	6.4	77.07	63.08	3.74	21.07	4.07	6.74	55.26	8.07	2.40325	4.7365	33.7362	17.0697	58.07	34.403	37.07	14.7365	5.07	13.07	2.40325	2.4	19.4	43.74	19.07	60.4
	7	0	0	12.9998	0	42.9995	0	0	0	0	86.41	0	17.75	0	39.42	31.58	0	11.333	0	40.0838	24	15.42	0	0	0	36.6662	42.08	0	6.75	36.33	0	26.08	0
	8	9.097	9.57025	0	13.9998	0	0	4.9	0	6.9	0	9.24	0	6.9	4.9	0	0.57	8.097	0	0	23.2368	56.56	6.4305	15	0	0	6.9	44.6673	6.9	34.33	18.76	64	49.43
	9	9.10825	0	0	0	0	0	0	0	0	33.3	3.1	15.7	74.6	34.3	0	75.8	0	0	0	61.441	0	4.4415	17.3	0	0	12.6	38.4412	0	0	4.8	28.4	44.4
	10	40.118	0.785	0	29.118	0	5.785	0	4.1	21.5	21.5	5.8	6.1	21.1	8.1	0	24.8	3.11825	4.11825	5.45175	58.7845	0	16.785	22.4	0	5.785	36.8	46.118	26.8	26.5	32.5	50.8	49.5
	11	32.13	5.46375	8.46375	8.13025	0	7.46375	0	4.8	55.1	21.3	4.8	2.1	0	67.2	0	32.2	18.1303	36.797	0	4.797	18.5	27.4635	17.5	2.1305	6.46375	19.1	51.4633	5.8	62.5	43.5	77.8	52.4
	12	0	23.4728	20.333	0	31.3332	16.528	0	4.5	7.1	0	17.2	0	28.1	15.2	0	54.4	0	0	29.8612	57.0003	9.5	4.8615	10.2	0	0	10.9	36.6675	4.2	67.4	18.0861	95	58.7
	13	7.1505	0	0	0	27.1835	0	0	34.9	29.1	47.1	0	0	0	29.5	0	25	7.81725	0	15.6665	47.484	34.3	1.1505	23.5	0	29.817	0	68.4832	7.2	15	44.2	79.5	25.3
	14	7.497	36.83	0	4.1705	24.9997	0	9.5	6.8	0	0	66.5	0	27.5	0	0	54.1	14.6665	0	34.5037	84.3335	0	7.83025	28	0	7.1705	0	83.8295	28	16.8	22.8	93.6	37
	15	41.838	13.849	0	9.83825	0	2.8385	7.5	0	2.2	0	67.2	29.5	47.5	37.1	10.5	17.8	5.17175	6.505	5.505	28.505	5.5	57.1713	27.8	3.505	0	74.5	43.838	0	7.2	28.8	88.5	3.8
	16	66.5265	53.4813	40.1853	6.8525	85.5182	6.8525	6.2	5.5	5.5	29.6	37.2	17.9	2.5	63.9	0	26.2	33.5187	5.8525	7.519	7.18575	45.6	37.1855	38.2	4.8525	0	2.2	1.519	3.5	69.2	78.3	62.2	42.8
Ext2	1	4.02	4.6865	61.02	8.69	0	5.02	2.02	6.35325	3.02	18.3532	51.0195	22.6865	7.6865	0	44.35	9.02	0	7.35	41.02	47.3327	31.35	31.0195	59.686	39.6863	6.6865	62.6857	54.686	6.35	42.69	56.35	50.02	68.69
	2	20.0308	5.36425	6.36	8.03	2.69775	6.36425	8.03	6.36425	31.36	7.36425	48.0305	2.36425	46.3638	59.0305	10.36	9.36	9.6975	63.03	42.37	71.3637	34.36	36.9995	19.364	15.3643	7.031	7.36425	35.364	5.03	75.03	7.03	100	58.03
	3	19.0428	6.37625	26.71	41.05	2.70975	7.37625	0	6.043	63.37	42.7092	56.709	5.043	4.37625	34.7092	17.71	59.71	22.376	30.71	6.38	84.3575	66.04	38.7092	36.0427	37.0427	7.7095	5.043	62.709	32.71	72.38	25.04	89.71	32.71
	4	29.0527	9.7195	4.39	18.39	5.053	6.053	5.05	7.053	7.72	21.386	36.0528	63.0525	41.3858	7.38625	39.39	40.05	8.053	17.39	38.38	81.7188	64.33	63.719	4.7195	4.7195	7.7195	54.3858	4.7195	5.39	80.05	36.99	70.39	55.06
	5	19.3942	46.3942	32.73	8.73	0	5.39425	3.39	4.39425	6.06	17.394	56.727	22.394	47.3937	71.0602	0	34.06	19.0607	52.72	43.06	69.3937	82.06	26.3942	19.7275	30.6665	42.394	15.0608	65.3935	41.73	78.72	61.4	68.07	67.06
	6	15.7365	0	6.07	9.4	0	6.40325	2.74	6.7365	43.74	8.07	24.0697	6.7365	68.0692	43.403	25.4	35.41	10.4032	57.06	47.66	33.403	56.07	53.7362	5.7365	0	44.7362	72.4027	0	38.74	67.4	74.07	100	21.41
	7	0	0	0	14.66	0	0	0	25.9997	0	38.0835	43.333	12.6665	34.6662	7.41725	41.75	40.42	15	6.42	36.33	47.6662	56.42	14.3332	41.6662	15	0	0	22.9997	55.67	71.75	0	70.42	61.42
	8	26.7635	6.5705	2.57	0	0	4.237	6.24	0	16.43	42.9032	0	0	6.90375	33.7635	19.57	47.11	0	43.66	52.01	61.0005	19.43	45.6662	6.90375	0	10.6668	54.9995	7.237	22.24	75	26	61.67	43.99
	9	9.10825	0	0	0	0	38.3327	0	0	67.5	65.1075	22.7748	28.333	52.7745	15.3332	0	59.3	0	7.1	0	85.4407	15	50.333	32.6662	0	0.44175	17.6665	16.333	45.8	79.3	39.8	49.4	46.4
	10	19.4515	4.11825	6.8	7.1	6.11825	6.45175	5.1	6.11825	42.2	0	27.1182	20.118	61.7845	34.118	71.8	25.5	0	4.8	27.8	54.4513	75.1	14.4515	19.118	0	6.11825	6.45175	37.4513	59.1	87.1	16.5	99.5	7.5
	11	27.7967	5.797	6.1	8.1	6.46375	6.13025	7.5	3.797	0	31.13	56.4633	62.7965	6.797	10.1303	79.1	9.1	0	5.8	18.5	55.1298	63.5	64.7965	1.797	6.13025	7.13025	52.4633	0	17.1	73.7	20.2	25.7	9.5
	12	0	0	7.2	0	5.8615	39.334	0	0	21	13.3332	0	0	17.1947	14.8615	14.9	64.5	14.8615	0	0	50.84	42.9	0	0	0	0	46.333	26.9995	12.6	64.7	2.2	32.1	0
	13	11.4838	0	0	0	0	6.48375	0	0	48.2	31.4838	34.1502	0	77.1497	0	43.2	33.8	0	50.9	0	79.1497	0	13.3332	13.6665	6.81725	0	15.817	0	6.8	67.7	2.8	79.1	17.5
	14	8.1635	0	6.8	4.5	8.504	0	38.2	0	7.2	11.6675	0	58.8368	13.6665	40.1703	17.8	0	0	7.5	0	17.497	11.6	14.3332	27.1635	0	0	0	13.6665	0	81.3	13.6	51.3	59.2
	15	19.1715	7.505	0	8.8	0	7.17175	5.5	2.505	66.8	42.1718	63.1713	33.8383	7.505	23.8382	47.8	60.6	0	3.2	3.2	33.1715	18.4	2.505	5.8385	5.505	0	0	0	0	19.2	46.4	33.1	8.5
	16	0	7.519	5.9	0	2.8525	0	7.5	0	5.2	22.1857	44.852	23.6665	60.8518	28.8523	58.9	19.5	8.8525	6.5	13	67.1852	29.9	4.8525	19.8525	2.8525	5.18575	0	5.8525	6.5	6.9	6.5	69.9	0
		Unpaired
	Trials	F1	F2	F3	F4	F5	F6	F7	F8	F9	F10	M1	M2	M3	M4	M5	M6	M7	M8	M9	M10
Ext1	1	0	0	0	0	1.02	0	0	0	0	0	0	1.35	0	0	0	24.6865	0	0	6.35325	4.35325
	2	0	0	0	0	2.7	0	3.031	2.69775	0	0	0	0	0	0	7.36	0	0	0	4.36425	0
	3	2.71	0	0	0	1.71	0	9.043	3.043	0	0	0	1.38	0	0	0	43.7092	0	0	0	0
	4	0	0	0	0	3.05	0	0	0	0	0	0	0	0	13	3.28	10.3863	0.71975	0	0.053	0
	5	6.39	0	0	10.33	0	0	0	0	0	0	0	0	0	0	0	33.394	0	0	0	4.061
	6	0	0	0	0	1.74	0	0	0	0	0	0	0	0	26.93	0	14.9998	0	0	0	0
	7	0	0	0	0	0	0	0	0	0	0	0	0	0	20.08	0	0	0	0	0	0
	8	0	0	0	0	0	0	0	6.90375	0	0	0	0	0	0	0	0	0	0	6.5705	0
	9	1.1	0	0	0	0	0	0	0	0	0	0	0	0	0	0	0	0	0	0	0
	10	0	0	0	0	0	0	0	0	0	18.6665	0	0	0	0	0	12.3332	14.1182	3.11825	0	0
	11	2.8	0	0	4.8	0	2.797	0	3.46375	0	0	23.4635	0	0	7.8	0	37.4633	23.1303	11.6665	0	0
	12	0	0	0	0	0	11	0	50.861	0	0	0	0	1.5	19.5	0	0	0	0	0	0
	13	0	0	0	0	0	0	0	0	0	0	0	0	0	5.2	2.5	14.6665	0	0	0	0
	14	0	0	0	0	0	0	0	0	0	0	0	0	0	0	1.8	25.497	0	0	0	0
	15	0	0	0	6.2	4.2	0	0	0	0	0	3.82925	0	0	0	0	0	0.17175	0	2.505	0
	16	0	0	0	0	0	0	0	11.6665	0	0	0	0	0	0	0	11.6665	6.18575	0	0	0
Ext2	1	0	4.35325	0	0	0	0	0	0	0	0	2.02	0	0	0	0	0	0	0	0	5.6865
	2	0	0	5.36425	0	0	0	5.031	0	0	3.031	0	0	0	3.031	0	14.3332	7.36425	0	0	0
	3	2.04	0	0	1.71	0	0	0	0	0	0	0	0	0	0	0	0	0	0	0	17.376
	4	0	0	0	0	0	2.38625	0	0	0	0	0	0	0	6.7195	0	0	21.386	0	0	2.71975
	5	0	0	0	0	0	0	0	3.39425	0	0	1.061	0	0	0	0	0	0	0	0	0
	6	0	0	0	29	0	0	5.07	0	0	0	0	0	0	0	0	0	0	3.73675	0	5.40325
	7	0	0	0	0	0	0	0	0	0	0	0	0	0	0	4.08	0	0	25.0837	0	0
	8	0	0	0	21.1	0	0	0	0	0	0	0	0	0	0	0	0	0	0	0	14.6665
	9	0	0	0	0	0	0	0	0	0	0	0	0	0	0	0	0	0	0	0	0
	10	0	0	0	0	0	0	0	0	0	0	3.45175	0	0	0	0	0	0	0	3.45175	0
	11	0	0	0	2.1	0	0	0	0	0	0	3.797	1.46375	0	0	0	0	0	0	0	0
	12	0	0	0	0	0	0	0	21.9997	0	0	12.1393	0	0	0	0	0	0	0	0	0
	13	0	0	0	0	0	0	0	0	0	0	0	0	0	0	0	0	0	0	0	0
	14	5.8	0	0	0	0	0	6.83725	0	0	13.9998	0	0	0	0	0	0	0	0	0	0
	15	0	0	0	0	13.505	0	0	0	0	0	0	0	0	0	0	0	43.838	0	0	2.8385
	16	0	0	0	10.9	0	0	0	0	0	0	0	0	0.8525	3.519	0	0	0	0	0	0
		Shock Only
	Trials	F1	F2	F3	F4	F5	F6	F7	F8	F9	F10	M1	M2	M3	M4	M5	M6	M7	M8	M9	M10
Ext1	1	0	0	0	0	0	0	0	0.68675	0	0.02	0	0	0	0	0	0	0	2.02	4.02	0
	2	0	3.69775	0	0	0	0	0	0	0	0	5.031	0	0	0	0	0	7.031	0	0	3.69775
	3	0	0	2.043	0	0	0	0	0	12.043	0	0	0	0	0	0	4.7095	0	0	0	6.7095
	4	0	0	0	0	0	0	0	10.6665	0	0	2.71975	0	0	0	0	0	2.71975	0	0	0
	5	0	0	0	0	0	0	2.061	0	0	0	14.0608	0.72775	0	0	0	0	0	0	0	0
	6	0	0	1.73675	0	0	0	0	0	0	1.73675	0	3.73675	0	0	0	0	0	0	0	0
	7	0	12.3332	0	0	0	0	0	0	0	0	0	0	0	0	0	0	0	0	0	0
	8	0	0	0	0	0	0	0	0	0	0	0.23725	0	0	0	0	28.9997	0	0	0	0
	9	0	0	0	0	0	0	0	0	0	0	0	0	0	0	0	0	0	0	0	0
	10	4.45175	0	0	0	18.6665	0	0	0	0	0	0	5.11825	1.1185	0	0	0	0	0	0	0
	11	0	0	0	2.1305	0	0	0	0	0	0	0	0	0	0	0	0	0	0	0	0
	12	0	16.8615	0	0	0	0	0	0	0	0	0	10	0	6.52825	0	0	0	2.195	0	0
	13	0	0	0	0	0	0	11.3332	0	0	0	0	0	0	0	0	0	0	0	0	0
	14	0	28.9995	0	0	0	0	0	0	0	0	0	0	0	0	0	0	0	0	0	0
	15	6.17175	0	0	0	0	0	5.8385	0	0	0	0	1.8385	0	0	0	0	0	0	0	0
	16	0	0	0	0	0	0	0	0	4.519	0	0	0	0	13.8522	0	4.519	0	0	0	0
Ext2	1	4.35325	0	0	9.35325	0	0	0	0	0	0	0	0	0	0	0	0	0	0	0	0
	2	0	0	14.6665	0	0	0	2.69775	21.6665	0	0	0	0	0	0	0	0	0	0	0	0
	3	0	0	2.37625	0	0	0	0	0	0	17.7095	0	0	0	0	0	5.37625	0.70975	0	0	0
	4	0	0	0	0	0	0	0	0	0	0	0	0	0	0	0	0	0	0	0	0
	5	0	34.394	0	0	0	0	0	0	0	0	0	0	0	0	0	0	0	0	0	0
	6	0	0	3.07	0	0	0	0	0	0	0	0	2.73675	0	0	12.6665	0	0	0	0	0
	7	0	0	0	0	0	0	0	0	0	0	0	0	0	12.7505	0	0	0	0	0	0
	8	0	13.3332	0	0	0	0	0	0	0	0	0	13.333	4.237	0	0	0	0	0	0	0
	9	0	0	0	0	0	0	12.333	19.6665	0	0	0	0	0	0	0	2.775	0	0	0	0
	10	0	0	4.785	0	0	0	0	0	0	0	0	0	0	0	0	7.54925	0	0	0	0
	11	0	0	0	0	0	0	0	0	0	0	0	0	0	0	3.797	0	0	0	0	0
	12	0	0	0	0	0	0	0	0	0	0	0	0	0	0	0	0	0	0	0	0
	13	0	0	0	0	0	0	0	0	0	0	0	0	0	0	0	0	0	0	0	0
	14	0	0	0	0	0	0	0	0	0	0	0	0	0	0	0	0	0	0	0	0
	15	0	0	0	0	0	0	0	0	0	0	0	0	0	0	0	3.8385	0	0	0	0
	16	0	0	0	0	0	0	0	0	0	0	0	0	0	0	0	0	4.519	3.18575	0	0
		Paired Reverse
	Trials	F1	F2	F3	F4	F5	M1	M2	M3	M4	M5
Ext1	1	7.35225	6.6855	0	59.6848	5.6855	5.019	7.6855	6.6855	0	0
	2	0	0.03	3.36325	5.03	15.3633	0	0	57.0295	34.363	6.03
	3	6.7085	1.70875	4.37525	5.042	6.042	0	0	18.375	0	0
	4	6.38525	4.052	5.38525	30.7183	0	16.7185	6.38525	3.052	0.38525	0
	5	17.0598	17.3932	5.39325	5.06	6.39325	12.06	4.7265	57.3927	5.39325	6.06
	6	35.4023	32.0685	3.069	0.73575	15.4023	28.402	4.40225	3.73575	34.402	4.40225
	7	6.41625	4.7495	5.7495	4.083	5.41625	6.083	2.083	6.7495	3.74975	0
	8	0	36.6662	0	0	0	0	0	29.4292	0	0
	9	5.4405	0	6.774	6.774	3.774	3.774	5.774	55.7735	0	3.10725
	10	67.1167	6.45075	4.45075	0	36.117	0	6.45075	7.11725	4.11725	11.6675
	11	4.796	2.1295	1.46275	1.796	5.46275	23.7958	0	57.1287	4.796	3.46275
	12	47.8045	0	0	0	0	0	0	77.471	5.13825	0
	13	7.48275	0	0	5.81625	3.81625	7.1495	0	81.1488	0	0
	14	0	0	0	0	0	0	0	83.4955	0	0
	15	8.504	3.504	3.8375	4.17075	3.8375	0	5.504	77.8367	0.50425	4.8375
	16	4.8515	0	0	4.8515	5.8515	2.8515	0	69.1838	0	0
Ext2	1	6.35225	6.6855	0	15.3522	5.019	4.019	5.019	53.3515	84.3515	4.6855
	2	25.6965	7.36325	5.03	5.6965	5.03	0	5.6965	54.0295	6.03	4.03
	3	4.7085	4.37525	2.37525	5.7085	53.0415	5.7085	2.042	37.0418	16.7085	6.042
	4	5.7185	4.052	0	4.052	5.052	0	2.71875	77.718	0	0
	5	3.39325	6.7265	4.06	0	5.7265	4.06	0	68.0593	5.39325	4.7265
	6	1.40225	1.069	2.069	58.735	7.069	0	0	19.7353	6.7355	14
	7	0	5.7495	0.74975	0	24.7492	0	2.083	78.0823	3.083	0.41625
	8	0	0	0	0	0	0	0	43.429	0	0
	9	13.1073	3.10725	0	3.4405	2.4405	39.4402	0	0	1.774	0
	10	27.117	5.11725	3.11725	0	3.11725	17.1172	0	8.11725	0	2.1175
	11	0	5.12925	2.46275	2.1295	6.796	27.4623	0	46.1287	0	0
	12	0	0	0	0	0	16.805	0	47.4712	0	0
	13	2.483	5.483	3.1495	0	0	0	0	52.4828	4.483	11.4827
	14	0	0	0	0	0	0	0	25.4958	0	0
	15	0	0	0	4.17075	2.8375	18.8373	3.17075	41.8368	0	0
	16	4.18475	4.518	0.18475	0.51825	25.8513	0	0	17.518	0	0
		Unpaired Reverse
	Trials	F1	F2	F3	F4	F5	M1	M2	M3	M4	M5
Ext1	1	0	0	5.019	0	0	0	2.019	0	0	0
	2	13.6965	0	0	0	0	0	0	2.03	0	3.03
	3	0	0	0	2.70875	0	0	0	0	0	0
	4	0	0	0	0	0	0	2.71875	0	0	0
	5	0	0	0	3.06	0	0	0	0	0	0
	6	0	0	0	0	0	0	0	0	0	0
	7	0	0	0	0	0	0	0	0	0	0
	8	0	0	0	0	0	0	0	0	0	21.333
	9	0	0	17.6665	0	0	0	0	0	0	0
	10	0	24.6665	0	0	0	0	0	0	0	0
	11	0	0	0	0	0	0	0	26.129	0	0
	12	0	0	0	0	0	0	0	0	0	0
	13	0	0	0	0	28.6663	0	0	0	0.81625	0
	14	0	0	0	0	0	0	0	0	0	0
	15	0	0	0	18.6665	0	10.9998	0	0	14.3332	16.504
	16	0	0	4.8515	1.18475	0	0	0	7.8515	0	0
Ext2	1	0	0	0	0	0	0	0	0	0	0
	2	0	0	0	0	0	0	0	0	0	0
	3	0	0	0.70875	0	0	0	0	0	3.042	0
	4	0	0	6.38525	2.71875	0	0	0	0	0	0
	5	0	0	0	2.72675	0	0	0	0	0	11.6668
	6	0	0	7.40225	10.3332	0	0	0	0	0	0
	7	0	0	0	0	0	0	0	21.6665	0	0
	8	0	0	0	0	0	0	0	0	0	0
	9	0	0	0	0	0	0	0	22.333	0	0
	10	0	12.9998	0	0	0	0	0	0	0	0
	11	0	0	0	0	0	0	16.3332	0	0	0
	12	0	0	0	0	0	0	0	0	0	0
	13	0	0	0	0	0	0	0	0	0	16.3332
	14	0	0	0	0	0	0	0	16.333	21.6665	0
	15	0	0	0	0	0	0	10.8372	0	0	39.6662
	16	13.1847	0	0	0	0	0	0	2.518	0.18475	4.518

## Sheet: 6F
Ext1 Change in WN %Freezing Early-Late					WN=white noise		F=female, M=male
	Paired
	F1	F2	F3	F4	F5	F6	F7	F8	F9	F10	F11	F12	F13	F14	F15	F16	M1	M2	M3	M4	M5	M6	M7	M8	M9	M10	M11	M12	M13	M14	M15	M16
	23.4741	25.6101	7.69475	1.35806	28.3161	-4.03056	0.7775	7.515	2.92	5.895	42.725	7.145	13.6075	10.8475	-39.035	18.5725	10.8452	-1.343	6.18363	18.8405	8.7275	18.8861	6.5875	-4.359	7.73613	1.6375	26.1309	-6.935	20.8525	22.92	68.515	8.025
	Unpaired
	F1	F2	F3	F4	F5	F6	F7	F8	F9	F10	M1	M2	M3	M4	M5	M6	M7	M8	M9	M10
	-0.6775	0	0	1.55	-1.07	0	-3.0185	1.48144	0	0	0.957313	-0.6825	0	-1.95	-1.585	-6.738	1.40944	0	-2.06638	-1.08831
	Paired Reverse
	F1	F2	F3	F4	F5	M1	M2	M3	M4	M5
	0.098063	-2.24306	-2.32156	-21.4091	-3.39638	-2.93413	-2.14169	56.6307	-8.561	-0.29813
	Unpaired Reverse
	F1	F2	F3	F4	F5	M1	M2	M3	M4	M5
	-3.42413	0	-0.04188	4.28562	7.16656	2.74994	-1.18444	1.45538	3.78737	3.3685
	Shock Only
	F1	F2	F3	F4	F5	F6	F7	F8	F9	F10	M1	M2	M3	M4	M5	M6	M7	M8	M9	M10
	1.54294	6.32544	-0.51075	0	0	0	4.29294	-2.83831	-1.881	-0.005	-1.93769	0.459625	0	3.46306	0	-0.04763	-2.43769	-0.505	-1.005	-2.60181

## Sheet: 6G
Ext2 Change in WN %Freezing Early-Late					WN=white noise		F=female, M=male
	Paired
	F1	F2	F3	F4	F5	F6	F7	F8	F9	F10	F11	F12	F13	F14	F15	F16	M1	M2	M3	M4	M5	M6	M7	M8	M9	M10	M11	M12	M13	M14	M15	M16
	-8.33188	-2.78063	-21.445	-15.715	0.224	-2.7895	9.025	-5.82713	5.4825	4.424	-12.4096	5.79881	14.8402	-2.06631	13.9725	-1.06	-7.8185	-12.595	-27.9875	-21.9423	-34.045	-33.8558	-13.3228	-20.4095	-5.99019	-28.4154	-34.4899	-9.045	-23.7625	-14.0275	-19.18	-32.3225
	Unpaired
	F1	F2	F3	F4	F5	F6	F7	F8	F9	F10	M1	M2	M3	M4	M5	M6	M7	M8	M9	M10
	0.94	-1.08831	-1.34106	2.2975	3.37625	-0.59656	0.451563	0	0	2.74219	-0.505	0	0.213125	-1.55788	0	-3.58331	3.77194	0	0	-5.73594
	Paired Reverse
	F1	F2	F3	F4	F5	M1	M2	M3	M4	M5
	-8.952	-3.11875	-1.01775	-6.53006	-9.86344	2.27744	-3.07638	-21.2019	-25.6518	-0.81869
	Unpaired Reverse
	F1	F2	F3	F4	F5	M1	M2	M3	M4	M5
	3.29619	0	-1.7735	-0.67969	0	0	2.70931	4.71275	4.70231	15.1294
	Shock Only
	F1	F2	F3	F4	F5	F6	F7	F8	F9	F10	M1	M2	M3	M4	M5	M6	M7	M8	M9	M10
	-1.08831	0	-4.26069	-2.33831	0	0	-0.67444	-5.41663	0	-4.42738	0	0	0	0	0	-0.38444	0.952313	0.796438	0	0
