# Supplementary material for: Contributions of associative and non-associative learning to the dynamics of defensive ethograms
Source: eLife. 2024 Dec 16;12:RP90414. doi: 10.7554/eLife.90414 (PMC11649235; doi:10.7554/eLife.90414)
Supplement: Figure 7—source data 1. [file elife-90414-fig7-data1.xlsx]

## Sheet: 7A
Paired total WN jump frequencies (20 randomly selected)		WN=white noise		First four trials only
Timepoint from Tone onset (s)	Total
0-0.5
0.5-1.0
1.0-1.5
1.5-2.0
2.0-2.5
2.5-3.0
3.0-3.5
3.5-4.0
4.0-4.5
4.5-5.0
5.0-5.5
5.5-6.0
6.0-6.5
6.5-7.0
7.0-7.5
7.5-8.0
8.0-8.5
8.5-9.0
9.0-9.5
9.5-10.0
10.0-10.5
10.5-11.0	5
11.0-11.5
11.5-12.0	2
12.0-12.5	1
12.5-13.0	1
13.0-13.5	1
13.5-14.0
14.0-14.5
14.5-15.0	1
15.0-15.5	2
15.5-16.0	1
16.0-16.5
16.5-17.0	1
17.0-17.5	1
17.5-18.0	3
18.0-18.5
18.5-19.0
19.0-19.5	2
Unpaired total WN jump frequencies
Timepoint from Tone onset (s)	Total
0-0.5
0.5-1.0
1.0-1.5
1.5-2.0
2.0-2.5
2.5-3.0
3.0-3.5
3.5-4.0
4.0-4.5
4.5-5.0
5.0-5.5
5.5-6.0
6.0-6.5
6.5-7.0
7.0-7.5
7.5-8.0
8.0-8.5
8.5-9.0
9.0-9.5
9.5-10.0
10.0-10.5
10.5-11.0
11.0-11.5
11.5-12.0
12.0-12.5
12.5-13.0
13.0-13.5
13.5-14.0
14.0-14.5
14.5-15.0
15.0-15.5
15.5-16.0
16.0-16.5
16.5-17.0
17.0-17.5
17.5-18.0
18.0-18.5
18.5-19.0
19.0-19.5
Shock Only total WN jump frequencies
Timepoint from Tone onset (s)	Total
0-0.5
0.5-1.0
1.0-1.5
1.5-2.0
2.0-2.5
2.5-3.0
3.0-3.5
3.5-4.0
4.0-4.5
4.5-5.0
5.0-5.5
5.5-6.0
6.0-6.5
6.5-7.0
7.0-7.5
7.5-8.0
8.0-8.5
8.5-9.0
9.0-9.5
9.5-10.0	1
10.0-10.5
10.5-11.0	1
11.0-11.5
11.5-12.0	1
12.0-12.5
12.5-13.0
13.0-13.5
13.5-14.0
14.0-14.5
14.5-15.0
15.0-15.5
15.5-16.0
16.0-16.5
16.5-17.0
17.0-17.5
17.5-18.0
18.0-18.5
18.5-19.0
19.0-19.5

## Sheet: 7B
Paired total WN dart frequencies (20 randomly selected)		WN=white noise		First four trials only
Timepoint from Tone onset (s)	Total
0-0.5
0.5-1.0
1.0-1.5
1.5-2.0	1
2.0-2.5	1
2.5-3.0
3.0-3.5
3.5-4.0
4.0-4.5
4.5-5.0
5.0-5.5
5.5-6.0
6.0-6.5
6.5-7.0
7.0-7.5
7.5-8.0
8.0-8.5
8.5-9.0
9.0-9.5
9.5-10.0	1
10.0-10.5
10.5-11.0
11.0-11.5
11.5-12.0	4
12.0-12.5
12.5-13.0	1
13.0-13.5
13.5-14.0	3
14.0-14.5
14.5-15.0	1
15.0-15.5
15.5-16.0	2
16.0-16.5
16.5-17.0	2
17.0-17.5
17.5-18.0	2
18.0-18.5
18.5-19.0
19.0-19.5
Unpaired total WN dart frequencies
Timepoint from Tone onset (s)	Total
0-0.5
0.5-1.0
1.0-1.5
1.5-2.0	1
2.0-2.5
2.5-3.0
3.0-3.5
3.5-4.0	1
4.0-4.5
4.5-5.0
5.0-5.5
5.5-6.0
6.0-6.5
6.5-7.0
7.0-7.5
7.5-8.0
8.0-8.5
8.5-9.0
9.0-9.5
9.5-10.0
10.0-10.5
10.5-11.0
11.0-11.5	1
11.5-12.0
12.0-12.5
12.5-13.0
13.0-13.5
13.5-14.0
14.0-14.5
14.5-15.0
15.0-15.5
15.5-16.0
16.0-16.5
16.5-17.0
17.0-17.5
17.5-18.0	1
18.0-18.5
18.5-19.0
19.0-19.5	2
Shock Only total WN dart frequencies
Timepoint from Tone onset (s)	Total
0-0.5
0.5-1.0
1.0-1.5
1.5-2.0
2.0-2.5
2.5-3.0
3.0-3.5	1
3.5-4.0
4.0-4.5	1
4.5-5.0
5.0-5.5
5.5-6.0
6.0-6.5
6.5-7.0
7.0-7.5
7.5-8.0
8.0-8.5
8.5-9.0
9.0-9.5	1
9.5-10.0
10.0-10.5	3
10.5-11.0
11.0-11.5	1
11.5-12.0
12.0-12.5	3
12.5-13.0	1
13.0-13.5	2
13.5-14.0
14.0-14.5	3
14.5-15.0
15.0-15.5
15.5-16.0
16.0-16.5
16.5-17.0
17.0-17.5	2
17.5-18.0	1
18.0-18.5	1
18.5-19.0	1
19.0-19.5	2

## Sheet: 7C
Ext1 WN %Cohort Jumps
Trials	PA	UN	PA-R	UN-R	SO
1	37.5	0	0	0	0
2	34.375	0	0	0	5
3	18.75	0	0	10	0
4	21.875	0	0	0	5
5	21.875	0	0	0	0
6	6.25	0	0	0	0
7	9.375	0	0	0	5
8	3.125	0	0	0	5
9	9.375	5	0	0	0
10	0	0	0	0	0
11	0	0	0	0	0
12	0	0	0	0	0
13	3.125	0	0	0	0
14	3.125	0	0	0	0
15	0	0	0	0	0
16	0	0	0	0	0

## Sheet: 7D
Ext1 WN %Cohort Darts
Trials	PA	UN	PA-R	UN-R	SO
1	9.375	6.25	30	0	12.5
2	9.375	0	10	10	3.125
3	9.375	3.125	20	0	9.375
4	15.625	3.125	30	0	15.625
5	9.375	3.125	10	0	12.5
6	12.5	9.375	10	0	12.5
7	28.125	6.25	20	20	12.5
8	18.75	6.25	20	0	9.375
9	18.75	6.25	0	0	21.875
10	28.125	0	10	20	18.75
11	31.25	3.125	30	0	6.25
12	28.125	0	10	0	6.25
13	28.125	9.375	10	0	15.625
14	15.625	6.25	30	10	18.75
15	28.125	12.5	0	10	6.25
16	12.5	0	20	10	12.5

## Sheet: 7E
Ext1
WN=white noise	PA	UN	PA-R	UN-R	SO
%Cohort jump to WN	50	5	0	10	10

## Sheet: 7F
Ext1
WN=white noise	PA	UN	PA-R	UN-R	SO
%Cohort dart to WN	78.125	50	90	50	90
