# Supplementary material for: Contributions of associative and non-associative learning to the dynamics of defensive ethograms
Source: eLife. 2024 Dec 16;12:RP90414. doi: 10.7554/eLife.90414 (PMC11649235; doi:10.7554/eLife.90414)
Supplement: Figure 8—source data 1. [file elife-90414-fig8-data1.xlsx]

## Sheet: 8A
Ext1 %Cohort Tail rattled to tone
Trials	PA	UN	PA-R	UN-R	SO
1	0	25	10	20	20
2	3.125	15	0	10	30
3	12.5	25	10	20	20
4	9.375	25	0	10	40
5	0	10	0	10	35
6	3.125	10	0	20	10
7	12.5	15	0	10	15
8	3.125	25	0	10	20
9	0	25	0	10	10
10	0	20	0	0	10
11	0	30	0	0	0
12	3.125	15	0	10	0
13	0	10	0	0	0
14	9.375	5	10	0	10
15	0	15	0	0	0
16	0	10	0	0	10

## Sheet: 8B
Ext1 %Cohort Tail rattled to WN					WN=white noise
Trials	PA	UN	PA-R	UN-R	SO
1	0	20	0	0	10
2	0	5	0	10	5
3	3.125	10	0	0	15
4	3.125	15	0	10	10
5	0	5	0	0	0
6	0	25	0	0	5
7	0	5	0	0	0
8	0	0	0	10	5
9	0	0	0	0	0
10	0	10	0	10	0
11	6.25	0	0	0	0
12	0	5	0	0	0
13	0	10	0	0	5
14	0	5	0	0	0
15	0	15	0	0	0
16	0	5	0	0	0

## Sheet: 8C
Total Tail Rattles to Tone			WN=white noise
	PA	UN	SO
Early Ext1	6	22	34
Late Ext1	2	13	6
Early Ext2	7	12	11
Late Ext2	2	2	2

## Sheet: 8D
Total Tail Rattles to WN			WN=white noise
	PA	UN	SO
Early Ext1	2	12	11
Late Ext1	1	7	1
Early Ext2	3	3	4
Late Ext2	3	2	1

## Sheet: 8E
Ext1
	PA	UN	PA-R	UN-R	SO
%Cohort tail rattled to tone	34.375	95	20	40	75

## Sheet: 8F
Ext1
WN=white noise	PA	UN	PA-R	UN-R	SO
%Cohort tail rattled to WN	12.5	55	0	30	35
